1 **Comparative genomics of *Xylella fastidiosa* suggests determinants of host-**  
2 **specificity and expands its mobile genetic elements repertoire**

3  
4 Guillermo Uceda-Campos<sup>1,2‡</sup>, Oseias R. Feitosa-Junior<sup>1‡§</sup>, Caio R. N. Santiago<sup>2</sup>, Paulo M.  
5 Pierry<sup>1</sup>, Paulo A. Zaini<sup>1,3</sup>, Wesley O. de Santana<sup>1,4</sup>, Joaquim Martins-Junior<sup>1†</sup>, Deibs Barbosa<sup>1</sup>,  
6 Luciano A. Digiampietri<sup>5</sup>, João C. Setubal<sup>1</sup>, and Aline M. da Silva<sup>1\*</sup>

7  
8 **Author Affiliations:**

9 <sup>1</sup>Departamento de Bioquímica, Instituto de Química, Universidade de São Paulo, São Paulo,  
10 SP, Brazil

11 <sup>2</sup>Programa de Pós-Graduação Interunidades em Bioinformática, Universidade de São Paulo,  
12 São Paulo, SP, Brazil

13 <sup>3</sup>Department of Plant Sciences, University of California, Davis, CA, USA

14 <sup>4</sup>Universidade Estadual do Piauí, Picos, PI, Brazil

15 <sup>5</sup>Escola de Artes, Ciências e Humanidades, Universidade de São Paulo, São Paulo, SP,  
16 Brazil

17

18 ‡These authors contributed equally to this work.

19 §Present address: Ludwig-Maximilian University of Munich, Munich, Germany

20 †Centro Nacional de Pesquisa em Energia e Materiais, Campinas, SP, Brazil

21

22 \***Corresponding author:** Aline M. da Silva, [almsilva@iq.usp.br](mailto:almsilva@iq.usp.br)

23

24 **Keywords:** phytopathogen, virulence, pangenome, prophage, phage-defense,  
25 Xanthomonadaceae

26 **Author notes:** All supporting data have been provided within the article or through  
27 supplementary data files; 02 supplementary tables and 01 supplementary figure are available  
28 with the online version of this article.

## 29 **Abstract**

30 The Gram-negative bacterium *Xylella fastidiosa* colonizes plant xylem vessels and is  
31 obligately vectored by xylem sap-feeding hemipteran insects. *X. fastidiosa* causes diseases in  
32 many plant species but in a variety of its plant hosts this bacterium behaves as a commensal  
33 endophyte. Originally confined to the Americas, infecting mainly grapevine, citrus and coffee  
34 plants, *X. fastidiosa* has spread to several plant species in Europe, causing devastating crop  
35 diseases. Although many pathogenicity and virulence factors have been identified in *X.*  
36 *fastidiosa* which enable the bacterium to successfully establish in the xylem tissue, the  
37 mechanisms by which distinct *X. fastidiosa* strains colonize and cause disease in specific  
38 plant hosts have not been fully elucidated. Here we present comparative analyses of 94  
39 publicly available whole-genome sequences of *X. fastidiosa* strains with the goal of providing  
40 insights into plant host specificity determinants for this phytopathogen as well as of expanding  
41 the knowledge of its mobile genetic elements (MGE) content, mainly prophages. Our results  
42 revealed a pangenome of 4,549 protein coding sequences (CDSs) which is still open. The  
43 core- and accessory genomes comprise 954 and 2,219 CDSs, respectively. Phylogenetic tree  
44 construction using all core genome CDSs grouped the strains in three major clades of  
45 subspecies *fastidiosa*, *multiplex* and *pauca*, with subclades related to the strains' sequence  
46 type (ST) obtained from multi-locus sequence typing (MLST). The geographic region where  
47 the strains were collected showed stronger association with the clades of *X. fastidiosa* strains  
48 rather than the plant species from which they were isolated. Among the CDS related to  
49 virulence and pathogenicity found in the core genome, those related to lipopolysaccharide  
50 (LPS) synthesis and trimeric autotransporter adhesins (TAA) are somewhat related with the  
51 plant host of a given strain according to phylogenetic inference. The *X. fastidiosa* accessory  
52 genome is represented by an abundant and heterogeneous mobilome, which includes a  
53 diversity of prophage regions. In summary, the genome comparisons reported here will enable  
54 a better understanding of the diversity of phylogenetically close genomes and warrant further  
55 investigation of LPS and TAAs as potential *X. fastidiosa* host-specificity determinants.

56

## 57 **Impact statement**

58 The bacterium *Xylella fastidiosa* is a pathogen that infects many plant species and has caused  
59 devastating diseases in grapevine, citrus, coffee, and olive plants. This phytopathogen *X.*  
60 *fastidiosa* is original from the Americas and has emerged in Europe where it is causing severe  
61 economic losses for olive producers, mainly in Italy. Although many pathogenicity and  
62 virulence factors have been identified in *X. fastidiosa*, which enable this bacterium to  
63 successfully establish in the xylem vessels network, the mechanisms by which distinct *X.*  
64 *fastidiosa* strains colonize and cause disease in the different plant host species have not been  
65 fully elucidated. The comparative analyses of 94 whole-genome sequences from *X. fastidiosa*  
66 strains from diverse hosts and geographic regions provide insights into host specificity  
67 determinants for this phytopathogen as well as expand the knowledge of its mobile genetic  
68 elements (MGE) content, mainly prophages. Our results contribute for a better understanding  
69 of the diversity of phylogenetically close genomes and warrant further experimental  
70 investigation of lipopolysaccharide and trimeric autotransporter adhesins as potential host-  
71 specificity determinants for *X. fastidiosa*.

72

## 73 **Data summary**

74 All genomic sequences were accessed from publicly available GenBank RefSeq database at  
75 NCBI (National Center for Biotechnology Information). A full listing of NCBI accession  
76 numbers for *X. fastidiosa* strains described in this paper is available in Table S1 (available in  
77 the online version of this article).

78

## 79 **Introduction**

80 *Xylella fastidiosa* is a Gram-negative bacterium in the Xanthomonadaceae family that  
81 colonizes the xylem vessels of its plant hosts and is exclusively vectored by xylem sap-feeding  
82 hemipteran insects [1, 2]. This bacterium causes several crop diseases, such as Pierce's  
83 disease (PD) of grapevine [3], citrus variegated chlorosis (CVC) [4], coffee leaf scorch (CLS)  
84 [5], plum leaf scald (PLS) [6], and olive quick decline syndrome (OQDS) [7]. While *X.*

85 *fastidiosa* has also been associated with diseases in many other plant species, the bacterium  
86 behaves as a commensal endophyte in a variety of its plant hosts [8, 9].

87  
88 A range of pathogenicity and virulence factors has been identified in *X. fastidiosa* that  
89 potentially enable the bacterium to overcome host defenses and successfully establish in the  
90 xylem tissue [1, 8, 10]. *X. fastidiosa* cells form biofilm-like structures that are crucial for  
91 successful acquisition and transmission by the insect vectors as well as for plant host  
92 colonization and pathogenesis [1, 11]. Progression of the disease symptoms are associated to  
93 *X. fastidiosa* systemic spread through the xylem vessel network which requires dispersal of  
94 bacterial cells from the biofilms [12-15] as well as twitching motility [16] and degradation of pit  
95 membranes by bacterial cell wall-degrading enzymes (CWDEs) [17, 18]. Moreover, symptoms  
96 severity is exacerbated by host-derived xylem occlusions (i.e., tyloses) elicited by *X. fastidiosa*  
97 colonization of grapevine [19]. Indeed, the symptoms caused by *X. fastidiosa* infection are  
98 suggestive of hydric stress and vary in intensity depending on pathogen genotype, plant host  
99 species/genotype, plant age, cultivation practices, and environmental conditions [10, 20].

100  
101 Originally confined to the Americas, infecting mainly grapevine, citrus and coffee plants, *X.*  
102 *fastidiosa* has spread to various plants species in a number of European countries, possibly  
103 through the importation of infected plant material [8, 21, 22]. Currently, most of *X. fastidiosa*  
104 strains are categorized in three major subspecies *fastidiosa*, *pauca* and *multiplex* which are  
105 presumed to have originated in Central America (subsp. *fastidiosa*), South America (subsp.  
106 *pauca*) and North America (subsp. *multiplex*) [8, 9, 23]. Another two subspecies (subsp.  
107 *sandyi* and *morus*) native from North America have also been proposed [24, 25]. Furthermore,  
108 *X. fastidiosa* strains can be classified into sequence types (STs) based on a multilocus  
109 sequence typing (MLST) scheme with seven housekeeping genes [26, 27].

110  
111 There is a loose association of *X. fastidiosa* subspecies or STs with host specificity, yet some  
112 strains can infect multiple hosts [10, 28]. Indeed, intersubspecific homologous recombination

113 is known to drive *X. fastidiosa* adaptation to novel hosts [24, 29, 30]. However, the  
114 mechanisms by which the distinct *X. fastidiosa* strains successfully colonize specific plant  
115 hosts remain unclear. *X. fastidiosa* lacks the Type III secretion system (T3SS) [31], a  
116 membrane-embedded nanomachine typical of Gram-negative pathogens, which delivers  
117 effector proteins directly into host cells triggering or suppressing defense mechanisms,  
118 respectively in resistant or susceptible plants [32]. Instead, *X. fastidiosa* type II secretion  
119 system (T2SS) seems to be a relevant delivering source of its virulence proteins [10, 15, 33,  
120 34]. It has been suggested that compatibility between xylem pit membrane carbohydrate  
121 composition and *X. fastidiosa* T2SS-secreted cell wall degrading enzymes is necessary for  
122 disease progression [35]. Moreover, since *X. fastidiosa* lipopolysaccharide (LPS) long chain  
123 O-antigen effectively delays plant innate immune recognition in grapevine, the heterogeneity  
124 of O-antigen composition may be among the mechanisms underlying *X. fastidiosa* host range  
125 [36].

126  
127 Comparative genomics studies of *X. fastidiosa* strains isolated from different plant hosts and  
128 from diverse geographical regions identified shared and exclusive genes among these strains,  
129 chromosome rearrangements, indels, single nucleotide polymorphisms (SNPs) as well as  
130 differences in their mobile genetic elements (MGE) repertoire, such as plasmids, genomic  
131 islands and prophages [22, 29, 30, 37-48]. While some studies suggest that strains belonging  
132 to a phylogenetic group have similar pathogenicity mechanisms and strong selection, possibly  
133 driven by host adaptation, and, therefore, can be separated in subspecies [45, 46], other  
134 studies identified differences in each phylogenetic clade, such as enriched molecular functions  
135 [43] and distinct rates and events of recombination [22, 29, 30, 47].

136  
137 The availability of new whole genome sequences of *X. fastidiosa* strains from diverse plant  
138 hosts and distinct geographical regions fosters up-to-date comparisons to be made. Here we  
139 present a comparative analysis of 94 *X. fastidiosa* genomes with the goal of providing insights  
140 into host specificity determinants for this phytopathogen as well as expanding the knowledge

141 of its MGE content.

142

## 143 **Methods**

### 144 **Data collection, curation, and annotation**

145 A collection of 132 *X. fastidiosa* genome assemblies were downloaded from National Center  
146 for Biotechnology Information (NCBI) RefSeq database [49]

147 (<https://www.ncbi.nlm.nih.gov/genome/genomes/173>) accessed in 2021-07-19 (Table S1).

148 This initial collection was curated following the workflow depicted in Fig. S1 to remove  
149 genomes of laboratory variants, redundancies, and assemblies with contamination  $\geq 5\%$ , or  
150 with  $\geq 1\%$  of ambiguous bases, or with less than 20 tRNA genes or missing any of the 3 rRNA  
151 genes. Contamination and completeness of genome assemblies were evaluated using  
152 CheckM software [50]. Ambiguous bases in the assemblies were evaluated using QUAST tool  
153 [51]. Genomes that were not selected in the first curation round but represented a non-  
154 redundant strain, host or geographical region and had an associated publication were  
155 retrieved and included in the final curated collection, making a total of 94 genome assemblies  
156 (Table S1; Table 1). This final collection was annotated using Prokaryotic Genome Annotation  
157 Pipeline (PGAP) [52] standalone software package (<https://github.com/ncbi/pgap>), release  
158 2021-07-01.build5508.

159

### 160 **Genome comparisons**

161 Comparative genomics analyses, pangenome, core genome and accessory genome  
162 reconstruction were performed using the Gene Tags Assessment by Comparative Genomics  
163 (GTACG) framework (<https://github.com/caiorns/GTACG-backend>). GTACG is based on an  
164 algorithm that uses clustering coefficient to find and maximize the number of orthologous  
165 groups in genomes from closely related strains [53]. The PGAP annotated genomes were  
166 uploaded in GTACG framework, and the protein coding sequences (CDSs) were compared  
167 using standalone BLASTP tool [54] with an e-value threshold of  $1e-10$ . The clustering tool in  
168 GTACG framework was used to find a threshold that maximizes the cluster coefficient of each

169 cluster. We found that a threshold of 45% of the alignment length was enough to produce  
170 concise homologous clusters. Metadata information of the *X. fastidiosa* strains (Table S1)  
171 such as plant host, country of isolation and sequence type (ST) were retrieved from NCBI  
172 RefSeq database, public databases for molecular typing and microbial genome diversity  
173 (PubMLST) [27] and from the literature, manually curated and analyzed together with the  
174 information provided by the GTACG framework.

175

### 176 **Phylogenetic analyses**

177 Amino acid sequences of core genome orthologous CDSs were aligned with Clustal Omega  
178 v.1.2.1 [55] using default parameters. For maximum-likelihood (ML) phylogenies, the  
179 alignments were concatenated and computed using IQ-TREE v.1.5.4 [56] with a model  
180 predicted by ModelFinder and an ultrafast bootstrap of 1,000 replicates [57].

181

### 182 **Functional Annotation**

183 Orthologous protein clusters encoded by the core, accessory and singleton genomes were  
184 compared to the Clusters of Orthologous Groups (COGs) [58] database using rpsblast+  
185 (BLAST version 2.9.0) [54], with a cut-off e-value of 1e-6. COG categories were assigned to  
186 the best hits of rpsblast+ analysis.

187

### 188 **Mobile genetic elements prediction**

189 Mobile Genetic Elements (MGE), such as prophages, genomic islands (GI) and insertion  
190 sequences (IS) were identified in the genome assemblies by a combination of prediction tools  
191 coupled with manual curation as previously described [59]. Prophage regions were predicted  
192 with Virsorter2 [60] and PHASTER [61]. Inovirus\_detector software  
193 (<https://github.com/simroux/Inovirus>) was used for identification of prophages from the  
194 Inoviridae family (filamentous single-stranded DNA phages) [62]. GI consensus regions were  
195 defined using the results of SeqWord Sniffer [63] and GIPSY [64] software, which was used to  
196 assign one or more categories related to GI potential function. GI regions overlapping to

197 prophages sequences were not considered. IS regions were predicted using the ISEScan [65]  
198 software. MGE regions predicted in each genome assembly were mapped in the genome for  
199 visual inspection and manual curation. Nucleotide sequences of prophages, GIs and ISs were  
200 compared to explore homology relationships using BLAST all-vs-all. The BLAST hits with an  
201 identity and coverage alignment higher than 40% and 75%, respectively, were filtered,  
202 analyzed and the resulting sequence similarity network (SSN) was visualized with Cytoscape  
203 3.8 software [66]. Finally, the most frequent prophages and genomic islands were retrieved for  
204 the evaluation of their gene content. Taxonomic classification of selected prophages was  
205 performed with vContact2 [67] and with PhaGCN [68].

206

### 207 **Prospection of anti-MGE defense systems**

208 CRISPR-Cas systems were searched with the software CRISPRFinder  
209 (<http://crispr.i2bc.paris-saclay.fr/Server/>) [69]. Hidden Markov Models (HMM) matrices were  
210 built to analyze known antiphage defense systems such as superinfection exclusion (SIE),  
211 Disarm, Brex, pAgos, Abortive Infection (Abi), Hachiman, ShedU, Septu, Lamassu, Druantia,  
212 Gabyja, Zorya and Wadjet [70]. To create HMM matrices, we recovered FASTA files with the  
213 amino acid sequences of each system from NCBI and IMG/M (Integrated Microbial Genomes  
214 & Microbiomes) databases [71] and created an alignment for a set of sequence of each  
215 system, which was then compared against the *X. fastidiosa* genomes. PIC1 elements (Phage-  
216 inducible chromosomal islands) were searched in *X. fastidiosa* genomes using an in-house  
217 Python pipeline that enables detection of the main PIC1 features [72]. Restriction-modification  
218 (R-M) systems were searched with BLASTP against the REBASE [73] database.

219

## 220 **RESULTS AND DISCUSSION**

### 221 **General features of *X. fastidiosa* genomes**

222 The main features of genome assemblies as well as plant host and country of isolation of 132  
223 *X. fastidiosa* strains publicly available until 2021-07-19 in NCBI RefSeq database are  
224 summarized in Table S1. This collection was curated following the pipeline depicted in Figure



225 S1 (to remove redundancies as well as genomes of laboratory variants) and 94 genome  
226 assemblies were selected for further analyses (Table S1; Table 1). These are high-quality  
227 draft genome sequences [74] given they present high completeness (>98%) and low  
228 contamination (<1.45%) according to CheckM [50] analysis. The average chromosome size of  
229 the selected 94 assemblies is 2,537,252 bp  $\pm$  90,235 bp with an average GC content of  
230 51.88%  $\pm$  0.36. Strains Hib4 (isolated from *Hibiscus* spp.) and Griffin-1 (isolated from *Quercus*  
231 *rubra*) have, respectively, the largest (2,813,286 bp) and smallest (2,387,314 bp) chromosome  
232 sizes. While 46 strains of the selected genome assemblies do not include plasmid related-  
233 contigs, the number of plasmids in the other strains is 1 (34 strains), 2 (9 strains), and 4 (5  
234 strains), which include conjugative and mobilizable as well as non-mobilizable plasmids [42].  
235 Chromosomes of the selected genomes have 2,291  $\pm$  131 CDS and 110  $\pm$  45 protein coding  
236 pseudogenes annotated by PGAP [52]. These results indicate a reasonable homogeneity in  
237 the genomes of distinct *X. fastidiosa* strains in relation to their chromosome sizes and GC  
238 content. In contrast, the plasmid content shows a greater diversity among strains consistent  
239 with previous observations [42].

240

#### 241 ***X. fastidiosa* pangenome and core genome**

242 The pangenome of *X. fastidiosa* (number of orthologous CDSs clusters present in the 94  
243 genomes) was calculated using GTACG framework [53], considering chromosome and  
244 plasmids CDSs, since pangenomes are composites of the host chromosome together with  
245 MGEs [75]. The pangenome growth curve has not yet reached saturation (Fig. 1a), indicating  
246 that the *X. fastidiosa* pangenome can be considered open and comprises 4,549 orthologous  
247 CDSs. The core genome curve (Fig. 1b) reveals that 954 CDSs belong to the core genome  
248 (conserved orthologous CDSs present in all 94 genomes). The pangenome frequency plot  
249 (Fig. 1c) shows the typical U-shape where 30.25% and 20.97% of pangenome p CDSs are  
250 detected, respectively, in a single genome (singleton genome) and in all genomes (core  
251 genome). Calculation of the soft-core genome (conserved orthologous CDSs present 95% of  
252 the selected genomes, i.e., 89 genomes) showed 1,567 CDSs (34.4% of the pangenome).

253 The values for core genome as well as the pangenome frequency values we report here are  
254 somewhat different than previously reported [30, 43, 48] because we have used different  
255 algorithms for genome annotation and clustering of orthologous CDSs as well as a larger  
256 number of genomes.

257

### 258 **Genome-scale phylogeny**

259 The core genome (954 CDSs) was used for a genome-scale phylogeny. The Maximum  
260 Likelihood (ML) tree (Fig. 2) grouped the 94 *X. fastidiosa* strains in three major clades defined  
261 by strains from the subspecies *fastidiosa*, *multiplex* and *pauca*. The strains from subspecies  
262 *morus* and *sandyi* grouped in subclades of the major *subsp. fastidiosa* clade. The overall  
263 topology of this core-genome based phylogeny tree agrees with a previously reported  
264 genome-wide phylogeny of 21 *X. fastidiosa* strains [45] and a *k-mers* based phylogeny of 72  
265 *X. fastidiosa* strains [30].

266

267 Information of ST, country of isolation and host of origin for each strain (Table S1) were  
268 integrated to the genome-scale phylogeny (Fig. 2) as an attempt to highlight correlations, if  
269 any, among strain features and their phylogenetic relationship. We observe that most of the  
270 subclades are congruent with groups of the STs as well as country of isolation. For example,  
271 strains of ST1 belong to subclades of *subsp. fastidiosa* major clade and have been isolated in  
272 USA and Spain. Both ST6 and ST7 strains are in subclades of *subsp. multiplex* along with  
273 strains from USA, Spain and France. ST11, ST14 and ST53 were distributed among strains of  
274 subspecies *pauca*, which the first two STs are from strains isolated in Brazil while ST53  
275 strains were isolated from Costa Rica and Italy. The strains from Italy were grouped with  
276 Costa Rica strains, corroborating the reported introduction of *X. fastidiosa* in Italy originating  
277 from Costa Rica [76]. Similarly, IVIA5235 (ST1; *subsp. fastidiosa*) isolated in Spain was  
278 possibly imported from North America as previously suggested [22]. In the case of STs  
279 represented by a single strain, most of them, such as ST5 (Ann-1), ST8 (sycamore-Sy-VA),  
280 ST43 (BB08-1), ST69 (Fb7), ST70 (Hib4), ST74 (CFBP8072) and ST76 (CFBP8356), are

281 found in a branch by themselves.

282

283 The core-based phylogeny indicates a weak association between host of origin with the major  
284 clades in the genome-scale ML tree (Fig.2). Some strains isolated from *Coffea*, *Citrus*, *Olea*,  
285 *Vitis*, and *Morus* belong to monophyletic clades. It has been shown that citrus and coffee  
286 strains from subspecies *pauca* seem to be limited to their original hosts, despite crop proximity  
287 and the presence of insect vectors [77, 78]. On the other hand, the core-based phylogeny also  
288 indicates that some strains isolated from *Coffea*, *Prunus*, and *Nerium* are distributed into the  
289 three distinct major clades. There is evidence that some strains can infect multiple hosts [28,  
290 79, 80] and that intersubspecific homologous recombination drives *X. fastidiosa* adaptation to  
291 novel hosts [24, 29, 30].

292

### 293 **Virulence factors as potential host specificity determinants**

294 We found that the vast majority (90%; 63/70) of the CDSs listed in Table S2, which were  
295 identified or predicted to be virulence and pathogenicity factors for *X. fastidiosa* [10, 34, 36,  
296 38, 81-84], belong either to the core or soft-core genomes. The lack of CDSs in some strains  
297 is mostly due to pseudogenization (data not shown). We highlight the polygalacturonase  
298 (PD1485 in Temecula1 strain) ortholog, previously reported to carry a frameshift mutation [38],  
299 which is confirmed as a pseudogene in strains from subspecies *pauca* isolated from citrus  
300 (strains 9a5c, U24D, Fb7, J1a12, B111, CVC0251, CVC0256, 11399 and XRB), coffee  
301 (strains 32 and 3124), and vinca (strain CFBP8078). All other strains from subspecies *pauca*  
302 such as Pr8x, 6c, Hib4, COF0324, CFBP8072, CODIRO and De-Donno harbor an intact  
303 polygalacturonase sequence, similarly to all other strains analyzed in this study from subsp.  
304 *multiplex* and *fastidiosa*. Polygalacturonase has been shown to be a critical virulence factor for  
305 *X. fastidiosa* pathogenesis in grapevine [18]; therefore, we hypothesize that another cell wall-  
306 degrading enzyme, such as a putative pectin-lyase [85], may perform that function in the  
307 strains that carry the frameshift mutation.

308

309 Each of the orthologous clusters of CDSs related to virulence/pathogenicity (Table S2) that  
310 belong to core or soft-core genomes was used for a separate phylogeny reconstruction. The  
311 resulting ML trees were inspected to verify evidence, if any, of association of clades and  
312 subclades with specific plant hosts. Among dozens of trees, we found that a few may reflect  
313 the kind of association we were looking for, such as the trees reconstructed with CDSs related  
314 to LPS biosynthesis and CDSs of the three trimeric autotransporter adhesins (TAA) (Fig.3)

315  
316 The ML trees (Fig. 3a) obtained with orthologous clusters of CDSs encoding the afimbrial  
317 adhesins *xadA1* (PD0731), *xadA2* (PD0744) and *xadA3* (PD0824) suggest that these genes,  
318 particularly *xadA1* and *xadA3*, are potential determinants of host specificity. These afimbrial  
319 adhesins mediate *X. fastidiosa* cell-cell aggregation and adhesion to surfaces during biofilm  
320 formation [11, 86]. The orthologs of PD0814 (O-antigen ligase family protein), PD0815  
321 (Glycosyltransferase family 2 protein) and PD0816 (CDP-glycerol glycerophosphotransferase  
322 family protein), which are related to LPS biosynthesis, generated ML trees (Fig. 3b) that also  
323 suggest these genes, particularly the O-antigen ligase, as potential determinants of host  
324 specificity. It has been shown that O-antigen delays plant innate immune recognition in  
325 grapevine and as such the heterogeneity of O-antigen composition may be related to *X.*  
326 *fastidiosa* host range [36]. Overall, our results suggest that differences in the sequences of  
327 virulence-related genes may contribute to define *X. fastidiosa* host-specificity.

328

### 329 **Unraveling *X. fastidiosa* accessory genome and its mobile genetic elements**

330 The distribution of core, singleton and accessory genomes of the 94 strains among COG  
331 functional categories is depicted in Fig. 4. As expected, the COG functional categories of  
332 highly conserved biological processes, such as “Translational, ribosomal structure, and  
333 biogenesis” (category J), and “Cell wall/membrane/envelope biogenesis” (category M)  
334 comprise a substantial fraction of the core genome in comparison to the accessory genome. In  
335 contrast, the accessory genome is enriched in category X (Mobilome: prophages,  
336 transposons), comprising ~15%. Other categories also enriched in the accessory genome are

337 “Replication, recombination and repair” (category L) and “Defense mechanisms” (category V)  
338 which is suggestive of the ability of *X. fastidiosa* strains to cope with stress conditions in  
339 distinct environments.

340  
341 The enrichment of the accessory genome in the mobilome-associated CDSs (COG category  
342 X) prompted us to explore the full set of MGEs (prophages, genomic islands, insertion  
343 sequences) in the genome assemblies of the 94 *X. fastidiosa* strains. Using a combination of  
344 prediction tools, sequences related to prophages, GIs, ISs, and plasmids were identified in the  
345 genome assemblies. We found that the content of MGEs varies considerably among the  
346 strains, ranging from ~5% to ~40% of the genome, with a mean value of  $19.2\% \pm 8.3$ . Among  
347 the strains with the higher MGE content are RH1, J1a12, Fb7 and MUL0034 (Fig. 5).

348  
349 *X. fastidiosa* genome assemblies harbor  $9 \pm 2$  prophage-related regions. Among the strains  
350 with complete genomes, IVIA5901, Hib4, MUL0034, and RH1 have the greatest number of  
351 prophage regions (10 regions) while the strains with the least prophage regions are Salento-1,  
352 Salento-2, De-Donno (5 regions). A previous study reported 6 and 8 prophage-like regions in  
353 complete genomes of 9a5c and Temecula1, respectively [87] and a comparison of 72 *X.*  
354 *fastidiosa* genomes revealed an average of 9.5, 9.3 and 8.5 prophage regions, respectively,  
355 for strains from subsp. *fastidiosa*, *multiplex* and *pauca* [30].

356  
357 The MGEs identified in the genome assemblies of the 94 strains were then grouped in a  
358 sequence similarity network (SSN). Fig. 6 shows the clusters representing the predicted *X.*  
359 *fastidiosa* mobilome. While some sequences are conserved in various strains (clusters in Fig.  
360 6) several are unique to a particular strain (shown in the bottom of Fig. 6). The sizes of these  
361 MGE sequences vary from ~4 kbp to 100 kbp for prophages and genomic islands, 100 bp to  
362 4.8 kbp for insertion sequences, and 1 kbp to 64.3 kbp for plasmids (data not shown). Most of  
363 the MGEs clusters are from GIs with an average size of  $23.7 \text{ kbp} \pm 11$ . A few GIs seem to be  
364 related to pathogenicity/virulence or to antibiotic resistance, such as cluster 1, cluster 10, and

365 cluster 17, which harbor CDSs encoding efflux RND transporter and toxin-antitoxin systems.  
366 ISs appear distributed mainly in six clusters with tightly connected nodes (clusters 4, 9, 12, 13,  
367 15, and 16) showing ISs commonly found among *X. fastidiosa* genomes. Several ISs of the  
368 clusters 4 and 8 are found within other MGEs such as prophages or genomic islands, while  
369 the other ISs were found in the chromosome. The ISs from clusters 4 and 8 belong to the  
370 IS200/IS605 family which is widely spread in Bacteria and Archaea [88]. Members of this  
371 family are unusual because they use obligatory single-strand DNA intermediates, which  
372 distinguishes them from classical IS [88].

373  
374 A closer examination of clusters 2, 8, 11, and 18 (Fig. 6) reveals that their prophage  
375 sequences carry lysozyme and holin proteins, commonly found in temperate and lytic  
376 bacteriophages. The sequences grouped in these 4 clusters belong from strains isolated from  
377 diverse countries such as Brazil, Mexico, Costa Rica, Italy, Spain and USA, and also in  
378 Taiwan in the case of clusters 2 and 11.

379  
380 Cluster 7 groups prophages classified as inoviruses [62] and identified in 68 of the 94  
381 genomes analyzed. Some inoviruses are present in two copies in a same strain such as  
382 Salento-1 and Salento-2 which could suggest superinfection events. It remains to be  
383 investigated whether multiple prophage carriage confers any fitness advantage to *X.*  
384 *fastidiosa*, as has been observed for *Pseudomonas aeruginosa*, where multiple prophage  
385 carriage seems to be beneficial during mixed bacterial infections [89]. Inoviruses play a  
386 relevant role in the structure in *P. aeruginosa* biofilm [90] and have been reported to encode  
387 *Zonula occludens* toxin (Zot) in several *Vibrio* species [91]. Zot protein seems to play a dual  
388 function as it is essential for inovirus morphogenesis and has also been reported to contribute  
389 for *Vibrio cholerae* pathogenesis [92, 93]. Zot-like CDSs are annotated in multiple inoviruses  
390 distributed among *X. fastidiosa* strains (data not shown). Zot proteins have been postulated as  
391 virulence factors for plant pathogens [94], including *X. fastidiosa* [41]. It is worth noting that  
392 EB92-1, a proposed *X. fastidiosa* biocontrol strain, lacks both Zot genes found in Temecula1

393 strain (PD0915 and PD0928) and as such Zot has been suggested as a potential *X. fastidiosa*  
394 virulence factor [95]. Moreover, a *X. fastidiosa* Zot protein was shown to elicit cell death-like  
395 responses in the apoplast of some *Nicotiana tabacum* cultivars [33]. Besides Zot, other  
396 prophage-encoded genes may play a role in the biology of *X. fastidiosa* as observed in other  
397 bacteria, where the so called “moron” loci have been related to virulence, stress resistance,  
398 phage resistance and host adaptation [96-98]. More studies are necessary to understand the  
399 contribution of “moron” loci, such as Zot genes, as well as events of prophage induction to *X.*  
400 *fastidiosa* biology. There is experimental evidence *X. fastidiosa* releases phage particles [99,  
401 100] but the impact of prophage induction in host colonization is unknown.

402

### 403 **Immunity systems prospection in *X. fastidiosa* genomes**

404 Since *X. fastidiosa* strains harbor numerous MGE, we made a screening of the well-known  
405 immunity systems in Gram-negative bacteria to evaluate *X. fastidiosa* strategy to deal with  
406 mobile genetic elements. Figure 7 shows the screening results for 46 *X. fastidiosa* genome  
407 assemblies. The SuperInfection Exclusion (SIE), Abortive infection, pAGOs, DISARM and  
408 BREX systems [101-105] are absent in all *X. fastidiosa* strains analyzed in this study. The  
409 same was observed for the recently reported systems HACHIMAN, SHEDU, SEPTU,  
410 LAMASSU and DRUANTIA [70]. Although we have found genes coding for proteins of the  
411 systems GABYJA and ZORYA [70] in all *X. fastidiosa* strains analyzed, none were inside an  
412 operon, and as such cannot be considered as true systems. The proteins gp41, gp42 and  
413 gp43 previously described as part of a SIE system operon in *X. fastidiosa* strain 53 [100] are  
414 found in several of the strains we have analyzed, although not as a complete operon and also  
415 not considered as true systems. We created HMM clusters and used them against all strains  
416 genomes searching for phage-inducible chromosomal islands (PICI) elements [72]. Although  
417 they are commonly found in Gram-negative bacteria, our analysis did not detect PICI elements  
418 in *X. fastidiosa* genomes.

419

420 A survey of Restriction-Modification systems (R-M system types I, II and III) [73, 106] in the 46

421 genome assemblies showed that all strains possess at least one of the three main R-M  
422 system types (Fig. 7) as previously reported for 9a5c and Temecula1 strains [107]. The type II  
423 is usually found in multiple operons per genome, while the type III is observed in a single  
424 operon per genome. We also searched for CRISPR sequences and genes encoding Cas  
425 proteins [69]. All potential CRISPR candidates found in the 94 genomes assemblies are not  
426 true CRISPRs according the CRISPRfinder tool [69]. Moreover, although  
427 genes encoding Cas-like proteins were found in some *X. fastidiosa* strains, they are not in the  
428 vicinity of any CRISPR candidates. Cas proteins are required for the functionality of the  
429 CRISPR/Cas immunity system [108]. Thus, similarly to major bacterial lineages [109], *X.*  
430 *fastidiosa* lacks a functional CRISPR-Cas viral defense system, which may contribute its  
431 permissiveness in prophage acquisition. Moreover, despite the fact that *X. fastidiosa* genomes  
432 encode R-M systems, a mechanism of immunity known to prevent both lytic and lysogenic  
433 infections in individual bacteria, it is reported to increase the number of prophage-acquiring  
434 individuals at the population level [110].

435  
436 We also investigated the presence of the WADJET system reported to act against foreign  
437 plasmidial DNA [70]. This system was found in most of the *X. fastidiosa* strains we analyzed,  
438 except in ATCC35879, OLS0479, CVC0256 and 6c (Fig. 7). Strains OLS0479, CVC0256 do  
439 not have WADJET system, which may contribute to harboring 4 plasmids each.

440

#### 441 **Final remarks**

442 The comparative analyses of 94 publicly available whole-genome sequences of *X. fastidiosa*  
443 strains revealed an open pangenome with 4,549 protein coding sequences (CDS). A core  
444 genome-scale phylogeny grouped these *X. fastidiosa* strains in three major clades defined by  
445 strains from the subspecies *fastidiosa*, *multiplex* and *pauca* consistent with previous *k-mers*  
446 based phylogeny of 72 *X. fastidiosa* strains [30]. Most of the subclades are congruent with  
447 groups of the STs as well as country of origin. Moreover, the geographic region where the  
448 strains were collected showed stronger association with the clades of *X. fastidiosa* strains



449 rather than the plant species from which they were isolated. The vast majority of the CDSs  
450 identified or predicted to be virulence and pathogenicity factors for *X. fastidiosa* belong either  
451 to the core or soft-core genomes. Among the CDS related to virulence and pathogenicity  
452 found in the core genome, those related to lipopolysaccharide (LPS) synthesis and trimeric  
453 autotransporter adhesins (TAA) are somewhat related with the plant host of a given strain  
454 according to phylogenetic inference, and as such may contribute to define *X. fastidiosa* host  
455 specificity. Finally, we found that the content of MGEs varies considerably among the strains,  
456 ranging from ~5% to ~40% of the genome assemblies and includes a diversity of sequences  
457 related to prophages, GI, IS and plasmids. It is worth noting the inoviruses sequences are  
458 found in all analyzed strains and that they encode a Zot protein which has been suggested to  
459 be a virulence factor for *X. fastidiosa*.

460  
461 Overall, the comparative analyses of 94 whole-genome sequences from *X. fastidiosa* strains  
462 from diverse hosts and geographic regions provide insights into host specificity determinants  
463 for this phytopathogen as well as expand the knowledge of its mobile genetic elements (MGE)  
464 content. Our results contribute for a better understanding of the diversity of phylogenetically  
465 close genomes and warrant further experimental investigation of lipopolysaccharide and  
466 trimeric autotransporter adhesins as potential host-specificity determinants for *X. fastidiosa*.

467

## 468 **References**

- 469 1. Chatterjee S, Almeida RPP, Lindow S: **Living in two worlds: The plant and insect**  
470 **lifestyles of *Xylella fastidiosa***. *Annual Review of Phytopathology* 2008, **46**:243-271.
- 471 2. Roper C, Castro C, Ingel B: ***Xylella fastidiosa*: bacterial parasitism with hallmarks**  
472 **of commensalism**. *Current Opinion in Plant Biology* 2019, **50**:140-147.
- 473 3. Hopkins DL, Purcell AH: ***Xylella fastidiosa*: Cause of Pierce's disease of grapevine**  
474 **and other emergent diseases**. *Plant Disease* 2002, **86**(10):1056-1066.
- 475 4. Rossetti V, Garnier M, Bove JM, Beretta MJG, Teixeira ARR, Quaggio JA, Denegri JD:  
476 **Occurrence of xylem-restricted bacteria in sweet orange trees affected by**

- 477            **chlorotic variegation, a new citrus disease in Brazil.** *Comptes Rendus de L*  
478            *Academie Des Sciences* 1990, **310**:345-349.
- 479    5.        de Lima JEO, Miranda VS, Hartung JS, Brlansky RH, Coutinho A, Roberto SR, Carlos  
480            EF: **Coffee leaf scorch bacterium: Axenic culture, pathogenicity, and comparison**  
481            **with Xylella fastidiosa of citrus.** *Plant Disease* 1998, **82**(1):94-97.
- 482    6.        Raju BC, Wells JM, Nyland G, Brlansky RH, Lowe SK: **Plum leaf scald - isolation,**  
483            **culture, and pathogenicity of the causal agent.** *Phytopathology* 1982, **72**(11):1460-  
484            1466.
- 485    7.        Saponari M, Boscia D, Altamura G, Loconsole G, Zicca S, D'Attoma G, Morelli M,  
486            Palmisano F, Saponari A, Tavano D *et al*: **Isolation and pathogenicity of Xylella**  
487            **fastidiosa associated to the olive quick decline syndrome in southern Italy.**  
488            *Scientific Reports* 2017, **7**.
- 489    8.        Sicard A, Zeilinger AR, Vanhove M, Schartel TE, Beal DJ, Daugherty MP, Almeida  
490            RPP: **Xylella fastidiosa: Insights into an Emerging Plant Pathogen.** In: *Annual*  
491            *Review of Phytopathology, Vol 56.* Edited by Leach JE, Lindow SE, vol. 56; 2018: 181-  
492            202.
- 493    9.        Almeida RPP, Nunney L: **How Do Plant Diseases Caused by Xylella fastidiosa**  
494            **Emerge?** *Plant Disease* 2015, **99**(11):1457-1467.
- 495    10.       Rapicavoli J, Ingel B, Blanco-Ulate B, Cantu D, Roper C: **Xylella fastidiosa: an**  
496            **examination of a re-emerging plant pathogen.** *Molecular Plant Pathology* 2018,  
497            **19**(4):786-800.
- 498    11.       Caserta R, Takita MA, Targon ML, Rosselli-Murai LK, de Souza AP, Peroni L, Stach-  
499            Machado DR, Andrade A, Labate CA, Kitajima EW *et al*: **Expression of Xylella**  
500            **fastidiosa Fimbrial and Afimbrial Proteins during Biofilm Formation.** *Applied and*  
501            *Environmental Microbiology* 2010, **76**(13):4250-4259.
- 502    12.       Ionescu M, Zaini PA, Baccari C, Tran S, da Silva AM, Lindow SE: **Xylella fastidiosa**  
503            **outer membrane vesicles modulate plant colonization by blocking attachment to**  
504            **surfaces.** *Proceedings of the National Academy of Sciences of the United States of*

- 505 *America* 2014, **111**(37):E3910-E3918.
- 506 13. Newman KL, Almeida RPP, Purcell AH, Lindow SE: **Cell-cell signaling controls**  
507 **Xylella fastidiosa interactions with both insects and plants**. *Proceedings of the*  
508 *National Academy of Sciences of the United States of America* 2004, **101**(6):1737-  
509 1742.
- 510 14. Guilhabert MR, Kirkpatrick BC: **Identification of Xylella fastidiosa antivirulence**  
511 **genes: Hemagglutinin adhesins contribute to X. fastidiosa biofilm maturation**  
512 **and colonization and attenuate virulence**. *Molecular Plant-Microbe Interactions*  
513 2005, **18**(8):856-868.
- 514 15. Gouran H, Gillespie H, Nascimento R, Chakraborty S, Zaini PA, Jacobson A, Phinney  
515 BS, Dolan D, Durbin-Johnson BP, Antonova ES *et al*: **The Secreted Protease PrtA**  
516 **Controls Cell Growth, Biofilm Formation and Pathogenicity in Xylella fastidiosa**.  
517 *Scientific Reports* 2016, **6**.
- 518 16. Meng YZ, Li YX, Galvani CD, Hao GX, Turner JN, Burr TJ, Hoch HC: **Upstream**  
519 **migration of Xylella fastidiosa via pilus-driven twitching motility**. *Journal of*  
520 *Bacteriology* 2005, **187**(16):5560-5567.
- 521 17. Perez-Donoso AG, Sun Q, Roper MC, Greve LC, Kirkpatrick B, Labavitch JM: **Cell**  
522 **Wall-Degrading Enzymes Enlarge the Pore Size of Intervessel Pit Membranes in**  
523 **Healthy and Xylella fastidiosa-Infected Grapevines**. *Plant Physiology* 2010,  
524 **152**(3):1748-1759.
- 525 18. Roper MC, Greve LC, Warren JG, Labavitch JM, Kirkpatrick BC: **Xylella fastidiosa**  
526 **requires polygalacturonase for colonization and pathogenicity in Vitis vinifera**  
527 **grapevines**. *Molecular Plant-Microbe Interactions* 2007, **20**(4):411-419.
- 528 19. Sun Q, Sun YL, Walker MA, Labavitch JM: **Vascular Occlusions in Grapevines with**  
529 **Pierce's Disease Make Disease Symptom Development Worse**. *Plant Physiology*  
530 2013, **161**(3):1529-1541.
- 531 20. Coletta HD, Castillo AI, Laranjeira FF, de Andrade EC, Silva NT, de Souza AA, Bossi  
532 ME, Almeida RPP, Lopes JRS: **Citrus Variegated Chlorosis: an Overview of 30**

- 533 **Years of Research and Disease Management. *Tropical Plant Pathology* 2020,**  
534 **45(3):175-191.**
- 535 21. Occhibove F, Chapman DS, Mastin AJ, Parnell SSR, Agstner B, Mato-Amboage R,  
536 Jones G, Dunn M, Pollard CRJ, Robinson JS *et al*: **Eco-Epidemiological**  
537 **Uncertainties of Emerging Plant Diseases: The Challenge of Predicting *Xylella***  
538 ***fastidiosa* Dynamics in Novel Environments. *Phytopathology* 2020, 110(11):1740-**  
539 **1750.**
- 540 22. Landa BB, Castillo AI, Giampetruzzi A, Kahn A, Roman-Ecija M, Velasco-Amo MP,  
541 Navas-Cortes JA, Marco-Noales E, Barbe S, Moralejo E *et al*: **Emergence of a Plant**  
542 **Pathogen in Europe Associated with Multiple Intercontinental Introductions.**  
543 ***Applied and Environmental Microbiology* 2020, 86(3).**
- 544 23. Schaad NW, Postnikova E, Lacy G, Fatmi M, Chang CJ: ***Xylella fastidiosa***  
545 **subspecies: *X. fastidiosa* subsp *piercei*, subsp. nov., *X. fastidiosa* subsp.**  
546 ***multiplex* subsp. nov., and *X. fastidiosa* subsp. *pauca* subsp. nov. (vol 27, pg**  
547 **290, 2004). *Systematic and Applied Microbiology* 2004, 27(6):763-763.**
- 548 24. Nunney L, Schuenzel EL, Scally M, Bromley RE, Stouthamer R: **Large-Scale**  
549 **Intersubspecific Recombination in the Plant-Pathogenic Bacterium *Xylella***  
550 ***fastidiosa* Is Associated with the Host Shift to Mulberry. *Applied and***  
551 ***Environmental Microbiology* 2014, 80(10):3025-3033.**
- 552 25. Schuenzel EL, Scally M, Stouthamer R, Nunney L: **A multigene phylogenetic study**  
553 **of clonal diversity and divergence in North American strains of the plant**  
554 **pathogen *Xylella fastidiosa*. *Applied and Environmental Microbiology* 2005,**  
555 **71(7):3832-3839.**
- 556 26. Scally M, Schuenzel EL, Stouthamer R, Nunney L: **Multilocus sequence type**  
557 **system for the plant pathogen *Xylella fastidiosa* and relative contributions of**  
558 **recombination and point mutation to clonal diversity. *Applied and Environmental***  
559 ***Microbiology* 2005, 71(12):8491-8499.**
- 560 27. Jolley KA, Bray JE, Maiden MCJ: **Open-access bacterial population genomics:**

- 561 **BIGSdb software, the PubMLST.org website and their applications.** *Wellcome*  
562 *Open Res* 2018, **3**:124.
- 563 28. Nunney L, Azad H, Stouthamer R: **An Experimental Test of the Host-Plant Range of**  
564 **Nonrecombinant Strains of North American Xylella fastidiosa subsp. multiplex.**  
565 *Phytopathology* 2019, **109**(2):294-300.
- 566 29. Potnis N, Kandel PP, Merfa MV, Retchless AC, Parker JK, Stenger DC, Almeida RPP,  
567 Bergsma-Vlami M, Westenberg M, Cobine PA *et al*: **Patterns of inter- and**  
568 **intrasubspecific homologous recombination inform eco-evolutionary dynamics**  
569 **of Xylella fastidiosa.** *Isme Journal* 2019, **13**(9):2319-2333.
- 570 30. Vanhove M, Retchless AC, Sicard A, Rieux A, Coletta HD, De La Fuente L, Stenger  
571 DC, Almeida RPP: **Genomic Diversity and Recombination among Xylella**  
572 **fastidiosa Subspecies.** *Applied and Environmental Microbiology* 2019, **85**(13).
- 573 31. Simpson AJG, Reinach FC, Arruda P, Abreu FA, Acencio M, Alvarenga R, Alves LMC,  
574 Araya JE, Baia GS, Baptista CS *et al*: **The genome sequence of the plant pathogen**  
575 **Xylella fastidiosa.** *Nature* 2000, **406**(6792):151-157.
- 576 32. Puhar A, Sansonetti PJ: **Type III secretion system.** *Current Biology* 2014,  
577 **24**(17):R784-R791.
- 578 33. Sertedakis M, Kotsaridis K, Tsakiri D, Mermigka G, Dominguez-Ferreras A, Ntoukakis  
579 V, Sarris PF: **Expression of putative effectors of different Xylella fastidiosa**  
580 **strains triggers cell death-like responses in various Nicotiana model plants.**  
581 *Molecular Plant Pathology* 2021, **00**:1-9.
- 582 34. Nascimento R, Gouran H, Chakraborty S, Gillespie HW, Almeida-Souza HO, Tu A,  
583 Rao BJ, Feldstein PA, Bruening G, Goulart LR *et al*: **The Type II Secreted**  
584 **Lipase/Esterase LesA is a Key Virulence Factor Required for Xylella fastidiosa**  
585 **Pathogenesis in Grapevines.** *Scientific Reports* 2016, **6**.
- 586 35. Sun QA, Greve LC, Labavitch JM: **Polysaccharide Compositions of Intervessel Pit**  
587 **Membranes Contribute to Pierce's Disease Resistance of Grapevines.** *Plant*  
588 *Physiology* 2011, **155**(4):1976-1987.

- 589 36. Rapicavoli JN, Blanco-Ulate B, Muszynski A, Figueroa-Balderas R, Morales-Cruz A,  
590 Azadi P, Dobruchowska JM, Castro C, Cantu D, Roper MC: **Lipopolysaccharide O-**  
591 **antigen delays plant innate immune recognition of *Xylella fastidiosa***. *Nature*  
592 *Communications* 2018, **9**.
- 593 37. Bhattacharyya A, Stilwagen S, Ivanova N, D'Souza M, Bernal A, Lykidis A, Kapatral V,  
594 Anderson L, Larsen N, Los T *et al*: **Whole-genome comparative analysis of three**  
595 **phytopathogenic *Xylella fastidiosa* strains**. *Proceedings of the National Academy of*  
596 *Sciences of the United States of America* 2002, **99**(19):12403-12408.
- 597 38. Van Sluys MA, de Oliveira MC, Monteiro-Vitorello CB, Miyaki CY, Furlan LR, Camargo  
598 LEA, da Silva ACR, Moon DH, Takita MA, Lemos EGM *et al*: **Comparative analyses**  
599 **of the complete genome sequences of Pierce's disease and citrus variegated**  
600 **chlorosis strains of *Xylella fastidiosa***. *Journal of Bacteriology* 2003, **185**(3):1018-  
601 1026.
- 602 39. Koide T, Zaini PA, Moreira LM, Vencio RZN, Matsukuma AY, Durham AM, Teixeira  
603 DC, El-Dorry H, Monteiro PB, da Silva ACR *et al*: **DNA microarray-based genome**  
604 **comparison of a pathogenic and a nonpathogenic strain of *Xylella fastidiosa***  
605 **delineates genes important for bacterial virulence**. *Journal of Bacteriology* 2004,  
606 **186**(16):5442-5449.
- 607 40. Doddapaneni H, Yao JQ, Lin H, Walker MA, Civerolo EL: **Analysis of the genome-**  
608 **wide variations among multiple strains of the plant pathogenic bacterium *Xylella***  
609 ***fastidiosa***. *Bmc Genomics* 2006, **7**.
- 610 41. da Silva VS, Shida CS, Rodrigues FB, Ribeiro DCD, de Souza AA, Coletta-Filho HD,  
611 Machado MA, Nunes LR, de Oliveira RC: **Comparative genomic characterization of**  
612 **citrus-associated *Xylella fastidiosa* strains**. *Bmc Genomics* 2007, **8**.
- 613 42. Pierry PM, Uceda-Campos G, Feitosa OR, Martins J, de Santana WO, Della Coletta H,  
614 Zaini PA, da-Silva AM: **Genetic Diversity of *Xylella fastidiosa* Plasmids Assessed**  
615 **by Comparative Genomics**. *Tropical Plant Pathology* 2020, **45**(3):342-360.
- 616 43. Denance N, Briand M, Gaborieau R, Gaillard S, Jacques MA: **Identification of**

- 617 **genetic relationships and subspecies signatures in *Xylella fastidiosa*. *Bmc***  
618 *Genomics* 2019, **20**.
- 619 44. Vanhove M, Sicard A, Ezennia J, Leviten N, Almeida RPP: **Population structure and**  
620 **adaptation of a bacterial pathogen in California grapevines. *Environmental***  
621 *Microbiology* 2020, **22(7):2625-2638**.
- 622 45. Marcelletti S, Scortichini M: **Genome-wide comparison and taxonomic relatedness**  
623 **of multiple *Xylella fastidiosa* strains reveal the occurrence of three subspecies**  
624 **and a new *Xylella* species. *Archives of Microbiology* 2016, **198(8):803-812**.**
- 625 46. Nunney L, Hopkins DL, Morano LD, Russell SE, Stouthamer R: **Intersubspecific**  
626 **Recombination in *Xylella fastidiosa* Strains Native to the United States: Infection**  
627 **of Novel Hosts Associated with an Unsuccessful Invasion. *Applied and***  
628 *Environmental Microbiology* 2014, **80(3):1159-1169**.
- 629 47. Castillo AI, Bojanini I, Chen HY, Kandel PP, De La Fuente L, Almeida RPP: **Allopatric**  
630 **Plant Pathogen Population Divergence following Disease Emergence. *Applied***  
631 *and Environmental Microbiology* 2021, **87(7)**.
- 632 48. Giampetruzzi A, Saponari M, Loconsole G, Boscia D, Savino VN, Almeida RPP, Zicca  
633 S, Landa BB, Chacon-Diaz C, Saldarelli P: **Genome-Wide Analysis Provides**  
634 **Evidence on the Genetic Relatedness of the Emergent *Xylella fastidiosa***  
635 **Genotype in Italy to Isolates from Central America. *Phytopathology* 2017,**  
636 **107(7):816-827**.
- 637 49. O'Leary NA, Wright MW, Brister JR, Ciufu S, Haddad D, McVeigh R, Rajput B,  
638 Robbertse B, Smith-White B, Ako-Adjei D *et al*: **Reference sequence (RefSeq)**  
639 **database at NCBI: current status, taxonomic expansion, and functional**  
640 **annotation. *Nucleic Acids Res* 2016, **44(D1):D733-745**.**
- 641 50. Parks DH, Imelfort M, Skennerton CT, Hugenholtz P, Tyson GW: **CheckM: assessing**  
642 **the quality of microbial genomes recovered from isolates, single cells, and**  
643 **metagenomes. *Genome Research* 2015, **25(7):1043-1055**.**
- 644 51. Gurevich A, Saveliev V, Vyahhi N, Tesler G: **QUAST: quality assessment tool for**

- 645 **genome assemblies. *Bioinformatics* 2013, 29(8):1072-1075.**
- 646 52. Tatusova T, DiCuccio M, Badretdin A, Chetvernin V, Nawrocki EP, Zaslavsky L,  
647 Lomsadze A, Pruitt KD, Borodovsky M, Ostell J: **NCBI prokaryotic genome**  
648 **annotation pipeline. *Nucleic Acids Res* 2016, 44(14):6614-6624.**
- 649 53. Santiago C, Assis RAB, Moreira LM, Digiampietri LA: **Gene Tags Assessment by**  
650 **Comparative Genomics (GTACG): A User-Friendly Framework for Bacterial**  
651 **Comparative Genomics. *Front Genet* 2019, 10:725.**
- 652 54. Camacho C, Coulouris G, Avagyan V, Ma N, Papadopoulos J, Bealer K, Madden TL:  
653 **BLAST plus : architecture and applications. *Bmc Bioinformatics* 2009, 10.**
- 654 55. Sievers F, Wilm A, Dineen D, Gibson TJ, Karplus K, Li WZ, Lopez R, McWilliam H,  
655 Remmert M, Soding J *et al*: **Fast, scalable generation of high-quality protein**  
656 **multiple sequence alignments using Clustal Omega. *Mol Syst Biol* 2011, 7.**
- 657 56. Nguyen LT, Schmidt HA, von Haeseler A, Minh BQ: **IQ-TREE: A Fast and Effective**  
658 **Stochastic Algorithm for Estimating Maximum-Likelihood Phylogenies. *Molecular***  
659 ***Biology and Evolution* 2015, 32(1):268-274.**
- 660 57. Minh BQ, Nguyen MAT, von Haeseler A: **Ultrafast Approximation for Phylogenetic**  
661 **Bootstrap. *Molecular Biology and Evolution* 2013, 30(5):1188-1195.**
- 662 58. Galperin MY, Makarova KS, Wolf YI, Koonin EV: **Expanded microbial genome**  
663 **coverage and improved protein family annotation in the COG database. *Nucleic***  
664 ***Acids Research* 2015, 43(D1):D261-D269.**
- 665 59. Oliveira Alvarenga D, Moreira LM, Chandler M, Varani AM: **A Practical Guide for**  
666 **Comparative Genomics of Mobile Genetic Elements in Prokaryotic Genomes.**  
667 ***Methods Mol Biol* 2018, 1704:213-242.**
- 668 60. Guo J, Bolduc B, Zayed AA, Varsani A, Dominguez-Huerta G, Delmont TO, Pratama  
669 AA, Gazitúa MC, Vik D, Sullivan MB *et al*: **VirSorter2: a multi-classifier, expert-**  
670 **guided approach to detect diverse DNA and RNA viruses. *Microbiome* 2021,**  
671 **9(1):ARTN 37.**
- 672 61. Arndt D, Grant JR, Marcu A, Sajed T, Pon A, Liang YJ, Wishart DS: **PHASTER: a**



- 673           **better, faster version of the PHAST phage search tool.** *Nucleic Acids Res* 2016,  
674           **44**(W1):W16-W21.
- 675   62.   Roux S, Krupovic M, Daly RA, Borges AL, Nayfach S, Schulz F, Sharrar A, Carnevali  
676   PBM, Cheng JF, Ivanova NN *et al*: **Cryptic inoviruses revealed as pervasive in**  
677   **bacteria and archaea across Earth's biomes.** *Nat Microbiol* 2019, **4**(11):1895-1906.
- 678   63.   Bezuidt O, Lima-Mendez G, Reva ON: **SeqWord Gene Island Sniffer: a Program to**  
679   **Study the Lateral Genetic Exchange among Bacteria.** *International Journal of*  
680   *Computer and Information Engineering* 2009, **34**:2399 - 2404.
- 681   64.   Soares SC, Geyik H, Ramos RTJ, de Sa PHCG, Barbosa EGV, Baumbach J,  
682   Figueiredo HCP, Miyoshi A, Tauch A, Silva A *et al*: **GIPSy: Genomic island**  
683   **prediction software.** *J Biotechnol* 2016, **232**:2-11.
- 684   65.   Xie Z, Tang H: **ISEScan: automated identification of insertion sequence elements**  
685   **in prokaryotic genomes.** *Bioinformatics* 2017, **33**(21):3340-3347.
- 686   66.   Shannon P, Markiel A, Ozier O, Baliga NS, Wang JT, Ramage D, Amin N,  
687   Schwikowski B, Ideker T: **Cytoscape: a software environment for integrated**  
688   **models of biomolecular interaction networks.** *Genome Res* 2003, **13**(11):2498-  
689   2504.
- 690   67.   Bolduc B, Jang HB, Doucier G, You ZQ, Roux S, Sullivan MB: **vConTACT: an iVirus**  
691   **tool to classify double-stranded DNA viruses that infect Archaea and Bacteria.**  
692   *PeerJ* 2017, **5**:e3243.
- 693   68.   Shang J, Jiang J, Sun Y: **Bacteriophage classification for assembled contigs**  
694   **using graph convolutional network.** *Bioinformatics* 2021, **37**(Supplement\_1):i25-i33.
- 695   69.   Couvin D, Bernheim A, Toffano-Nioche C, Touchon M, Michalik J, Neron B, Rocha  
696   EPC, Vergnaud G, Gautheret D, Pourcel C: **CRISPRCasFinder, an update of**  
697   **CRISRFinder, includes a portable version, enhanced performance and integrates**  
698   **search for Cas proteins.** *Nucleic Acids Res* 2018, **46**(W1):W246-W251.
- 699   70.   Doron S, Melamed S, Ofir G, Leavitt A, Lopatina A, Keren M, Amitai G, Sorek R:  
700   **Systematic discovery of antiphage defense systems in the microbial**

- 701 **pangenome**. *Science* 2018, **359**(6379):ARTN eaar4120.
- 702 71. Chen IMA, Chu K, Palaniappan K, Ratner A, Huang J, Huntemann M, Hajek P, Ritter  
703 S, Varghese N, Seshadri R *et al*: **The IMG/M data management and analysis**  
704 **system v.6.0: new tools and advanced capabilities**. *Nucleic Acids Research* 2021,  
705 **49**(D1):D751-D763.
- 706 72. Fillol-Salom A, Martinez-Rubio R, Abdulrahman RF, Chen J, Davies R, Penades JR:  
707 **Phage-inducible chromosomal islands are ubiquitous within the bacterial**  
708 **universe**. *Isme Journal* 2018, **12**(9):2114-2128.
- 709 73. Roberts RJ, Vincze T, Posfai J, Macelis D: **REBASE-a database for DNA restriction**  
710 **and modification: enzymes, genes and genomes**. *Nucleic Acids Res* 2015,  
711 **43**(D1):D298-D299.
- 712 74. Bowers RM, Kyrpides NC, Stepanauskas R, Harmon-Smith M, Doud D, Reddy TBK,  
713 Schulz F, Jarett J, Rivers AR, Eloie-Fadrosch EA *et al*: **Minimum information about a**  
714 **single amplified genome (MISAG) and a metagenome- assembled genome**  
715 **(MIMAG) of bacteria and archaea**. *Nat Biotechnol* 2018, **35**(8):725-731.
- 716 75. Brockhurst MA, Harrison E, Hall JPJ, Richards T, McNally A, MacLean C: **The**  
717 **Ecology and Evolution of Pangenomes**. *Current Biology* 2019, **29**(20):R1094-  
718 R1103.
- 719 76. Martelli GP, Boscia D, Porcelli F, Saponari M: **The olive quick decline syndrome in**  
720 **south-east Italy: a threatening phytosanitary emergency**. *European Journal of*  
721 *Plant Pathology* 2016, **144**(2):235-243.
- 722 77. Lopes SA, Raiol LL, Torres SCZ, Martins EC, Prado SS, Beriam LOS: **Differential**  
723 **Responses of Tobacco to the Citrus Variegated Chlorosis and Coffee Stem**  
724 **Atrophy Strains of Xylella fastidiosa**. *Phytopathology* 2020, **110**(3):567-573.
- 725 78. Almeida RPP, Nascimento FE, Chau J, Prado SS, Tsai CW, Lopes SA, Lopes JRS:  
726 **Genetic structure and biology of Xylella fastidiosa strains causing disease in**  
727 **citrus and coffee in Brazil**. *Applied and Environmental Microbiology* 2008,  
728 **74**(12):3690-3701.

- 729 79. Abou Kubaa R, Giampetruzzi A, Altamura G, Saponari M, Saldarelli P: **Infections of**  
730 **the *Xylella fastidiosa* subsp. pauca Strain "De Donno" in Alfalfa (*Medicago***  
731 ***sativa*) Elicits an Overactive Immune Response.** *Plants-Basel* 2019, **8**(9).
- 732 80. Pereira WEL, Ferreira CB, Caserta R, Melotto M, de Souza AA: ***Xylella fastidiosa***  
733 **subsp. pauca and fastidiosa Colonize Arabidopsis Systemically and Induce**  
734 **Anthocyanin Accumulation in Infected Leaves.** *Phytopathology* 2019, **109**(2):225-  
735 232.
- 736 81. Gluck-Thaler E, Cerutti A, Perez-Quintero AL, Butchacas J, Roman-Reyna V,  
737 Madhavan VN, Shantharaj D, Merfa MV, Pesce C, Jauneau A *et al*: **Repeated gain**  
738 **and loss of a single gene modulates the evolution of vascular plant pathogen**  
739 **lifestyles.** *Sci Adv* 2020, **6**(46):eabc4516.
- 740 82. Assis RDB, Polloni LC, Patane JSL, Thakur S, Felestrino EB, Diaz-Caballero J,  
741 Digiampietri LA, Goulart LR, Almeida NF, Nascimento R *et al*: **Identification and**  
742 **analysis of seven effector protein families with different adaptive and**  
743 **evolutionary histories in plant-associated members of the Xanthomonadaceae.**  
744 *Scientific Reports* 2017, **7**:ARTN 16133.
- 745 83. Voegel TM, Doddapaneni H, Cheng DW, Lin H, Stenger DC, Kirkpatrick BC, Roper  
746 MC: **Identification of a response regulator involved in surface attachment,**  
747 **cellcell aggregation, exopolysaccharide production and virulence in the plant**  
748 **pathogen *Xylella fastidiosa*.** *Molecular Plant Pathology* 2013, **14**(3):256-264.
- 749 84. Cruz LF, Parker JK, Cobine PA, De la Fuente L: **Calcium-Enhanced Twitching**  
750 **Motility in *Xylella fastidiosa* Is Linked to a Single PilY1 Homolog.** *Applied and*  
751 *Environmental Microbiology* 2014, **80**(23):7176-7185.
- 752 85. Feitosa OR, Stefanello E, Zaini PA, Nascimento R, Pierry PM, Dandekar AM, Lindow  
753 SE, da Silva AM: **Proteomic and Metabolomic Analyses of *Xylella fastidiosa* OMV-**  
754 **Enriched Fractions Reveal Association with Virulence Factors and Signaling**  
755 **Molecules of the DSF Family.** *Phytopathology* 2019, **109**(8):1344-1353.
- 756 86. Esteves MB, Nalin JL, Kudlawiec K, Salviatto RC, Sales TD, Sicard A, de Almeida

- 757 RPP, de Souza AA, Lopes JRS: **XadA2 Adhesin Decreases Biofilm Formation and**  
758 **Transmission of Xylella fastidiosa subsp.pauca.** *Insects* 2020, **11**(8).
- 759 87. Varani AM, Souza RC, Nakaya HI, de Lima WC, de Almeida LGP, Kitajima EW, Chen  
760 J, Civerolo E, Vasconcelos ATR, Van Sluys MA: **Origins of the Xylella fastidiosa**  
761 **Prophage-Like Regions and Their Impact in Genome Differentiation.** *Plos One*  
762 2008, **3**(12).
- 763 88. He S, Corneloup A, Guynet C, Lavatine L, Caumont-Sarcos A, Siguier P, Marty B,  
764 Dyda F, Chandler M, Ton Hoang B: **The IS200/IS605 Family and "Peel and Paste"**  
765 **Single-strand Transposition Mechanism.** *Microbiol Spectr* 2015, **3**(4).
- 766 89. Burns N, James CE, Harrison E: **Polylysogeny magnifies competitiveness of a**  
767 **bacterial pathogen in vivo.** *Evol Appl* 2015, **8**(4):346-351.
- 768 90. Secor PR, Michaels LA, Smigiel KS, Rohani MG, Jennings LK, Hisert KB, Arrigoni A,  
769 Braun KR, Birkland TP, Lai Y *et al*: **Filamentous Bacteriophage Produced by**  
770 **Pseudomonas aeruginosa Alters the Inflammatory Response and Promotes**  
771 **Noninvasive Infection In Vivo.** *Infect Immun* 2017, **85**(1).
- 772 91. Mauritzen JJ, Castillo D, Tan D, Svenningsen SL, Middelboe M: **Beyond Cholera:**  
773 **Characterization of zot-Encoding Filamentous Phages in the Marine Fish**  
774 **Pathogen Vibrio anguillarum.** *Viruses* 2020, **12**(7):730.
- 775 92. Waldor MK, Mekalanos JJ: **Lysogenic conversion by a filamentous phage**  
776 **encoding cholera toxin.** *Science* 1996, **272**(5270):1910-1914.
- 777 93. Fasano A, Baudry B, Pumphlin DW, Wasserman SS, Tall BD, Ketley JM, Kaper JB:  
778 **Vibrio cholerae produces a second enterotoxin, which affects intestinal tight**  
779 **junctions.** *Proc Natl Acad Sci U S A* 1991, **88**(12):5242-5246.
- 780 94. Hagemann M, Hasse D, Berg G: **Detection of a phage genome carrying a zonula**  
781 **occludens like toxin gene (zot) in clinical isolates of Stenotrophomonas**  
782 **maltophilia.** *Arch Microbiol* 2006, **185**(6):449-458.
- 783 95. Zhang SJ, Chakrabarty PK, Fleites LA, Rayside PA, Hopkins DL, Gabriel DW: **Three**  
784 **New Pierce's Disease Pathogenicity Effectors Identified Using Xylella fastidiosa**

- 785            **Biocontrol Strain EB92-1.** *Plos One* 2015, **10**(7).
- 786    96.    Cumby N, Davidson AR, Maxwell KL: **The moron comes of age.** *Bacteriophage* 2012,
- 787            **2**(4):225-228.
- 788    97.    Owen SV, Canals R, Wenner N, Hammarlof DL, Kroger C, Hinton JCD: **A window**
- 789            **into lysogeny: revealing temperate phage biology with transcriptomics.** *Microbial*
- 790            *Genomics* 2020, **6**(2).
- 791    98.    Tsao YF, Taylor VL, Kala S, Bondy-Denomy J, Khan AN, Bona D, Cattoir V, Lory S,
- 792            Davidson AR, Maxwell KL: **Phage Morons Play an Important Role in Pseudomonas**
- 793            **aeruginosa Phenotypes.** *Journal of Bacteriology* 2018, **200**(22):e00189-00118.
- 794    99.    Chen JC, Civerolo EL: **Morphological evidence for phages in Xylella fastidiosa.**
- 795            *Virology Journal* 2008, **5**:ARTN 75.
- 796    100.    Summer EJ, Enderle CJ, Ahern SJ, Gill JJ, Torres CP, Appel DN, Black MC, Young R,
- 797            Gonzalez CF: **Genomic and Biological Analysis of Phage Xfas53 and Related**
- 798            **Prophages of Xylella fastidiosa.** *Journal of Bacteriology* 2010, **192**(1):179-190.
- 799    101.    Labrie SJ, Samson JE, Moineau S: **Bacteriophage resistance mechanisms.**
- 800            *NATURE REVIEWS MICROBIOLOGY* 2010, **8**(5):317-327.
- 801    102.    Ofir G, Melamed S, Sberro H, Mukamel Z, Silverman S, Yaakov G, Doron S, Sorek R:
- 802            **DISARM is a widespread bacterial defence system with broad anti-phage**
- 803            **activities.** *Nat Microbiol* 2018, **3**(1):90-98.
- 804    103.    Willkomm S, Makarova KS, Grohmann D: **DNA silencing by prokaryotic Argonaute**
- 805            **proteins adds a new layer of defense against invading nucleic acids.** *FEMS*
- 806            *Microbiol Rev* 2018, **42**(3):376-387.
- 807    104.    Goldfarb T, Sberro H, Weinstock E, Cohen O, Doron S, Charpak-Amikam Y, Afik S,
- 808            Ofir G, Sorek R: **BREX is a novel phage resistance system widespread in**
- 809            **microbial genomes.** *Embo J* 2015, **34**(2):169-183.
- 810    105.    Dy RL, Przybilski R, Semeijn K, Salmond GPC, Fineran PC: **A widespread**
- 811            **bacteriophage abortive infection system functions through a Type IV toxin-**
- 812            **antitoxin mechanism.** *Nucleic Acids Res* 2014, **42**(7):4590-4605.

- 813 106. Oliveira PH, Touchon M, Rocha EPC: **The interplay of restriction-modification**  
814 **systems with mobile genetic elements and their prokaryotic hosts.** *Nucleic Acids*  
815 *Res* 2014, **42**(16):10618-U10803.
- 816 107. Matsumoto A, Igo MM: **Species-Specific Type II Restriction-Modification System**  
817 **of *Xylella fastidiosa* Temecula1.** *Applied and Environmental Microbiology* 2010,  
818 **76**(12):4092-4095.
- 819 108. Deveau H, Garneau JE, Moineau S: **CRISPR/Cas System and Its Role in Phage-**  
820 **Bacteria Interactions.** *Annu Rev Microbiol* 2010, **64**:475-493.
- 821 109. Burstein D, Sun CL, Brown CT, Sharon I, Anantharaman K, Probst AJ, Thomas BC,  
822 Banfield JF: **Major bacterial lineages are essentially devoid of CRISPR-Cas viral**  
823 **defence systems.** *Nature Communications* 2016, **7**:ARTN 10613.
- 824 110. Pleska M, Lang M, Refardt D, Levin BR, Guet CC: **Phage-host population dynamics**  
825 **promotes prophage acquisition in bacteria with innate immunity.** *Nat Ecol Evol*  
826 2018, **2**(2):359-366.

827

## 828 **Funding Information**

829 Funding for this work was provided by São Paulo Research Foundation (FAPESP), research  
830 grant 08/11703-4, and by Coordination for the Improvement of Higher Education Personnel  
831 (CAPES), research grant 3385/2013. P.A.Z., P.M.P. and J.M.J. were supported by FAPESP  
832 fellowships 11/09409-3, 09/13527-1, and 11/01217-8, respectively. C.R.N.S., D.B., G.U.C.,  
833 O.R.F.J. and W.O.S. received fellowships from CAPES. A.M.D.S. and J.C.S. received  
834 research fellowship awards from the National Council for Scientific and Technological  
835 Development (CNPq). The funders had no role in study design, data collection and analysis,  
836 decision to publish, or preparation of the manuscript.

837

## 838 **Authors Contributions**

839 Conceptualization: A.M.D.S., G.U.C., O.R.F.J. Methodology: C.R.N.S., G.U.C., J.C.S., J.M.J.,  
840 L.A.D., O.R.F.J. Computing resources: C.R.N.S., J.C.S., L.A.D. Data curation: C.R.N.S.,

841 G.U.C., O.R.F.J. Formal analysis: A.M.D.S., D.B., G.U.C., J.M.J., O.R.F.J., P.A.Z., P.M.P.,  
842 W.O.S. Visualization: G.U.C., O.R.F.J. Writing – original draft preparation: G.U.C., O.R.F.J.,  
843 P.A.Z., P.M.P. Writing – review and editing: A.M.D.S., G.U.C., O.R.F.J. Supervision: A.M.D.S.  
844 Funding acquisition: A.M.D.S, J.C.S. All authors read, provided critical review, and approved  
845 the final manuscript.

846

## 847 **Conflicts of interest**

848 The authors declare that there are no conflicts of interest.

849

## 850 **Acknowledgements**

851 We thank Santiago Justo Arevalo and Fernando P.N. Rossi for sharing bioinformatics Python  
852 scripts. We also thank Carlos Morais Piroupo for computational support.

## 853 **Figure Legends**

854 **Fig. 1.** Pangenome and core-genome of 94 *Xylella fastidiosa* strains. Pangenome (a) and  
855 core genome (b) curves. Each boxplot represents the distribution of the number of  
856 orthologous CDSs clusters added (pangenome) or in common (core genome) with the addition  
857 of new genomes. Pangenome frequency plot (c). Number of orthologous CDSs detected in a  
858 single genome (left) and in all analyzed genomes (right).

859

860 **Fig. 2.** Core genome-scale phylogeny. Amino acid sequences of 954 CDSs of *X. fastidiosa*  
861 (94 strains) core genome were used for a Maximum Likelihood (ML) phylogenetic  
862 reconstruction. The three major clades grouped strains from subspecies *fastidiosa*, *multiplex*  
863 and *pauca*. Information of sequence type (ST), country of isolation and host of origin for each  
864 strain (Table 1) are represented by the squares followed by the indicated color legends.

865

866 **Fig. 3.** Phylogeny reconstruction of selected CDS. Maximum Likelihood (ML) phylogenetic  
867 reconstruction of CDS of three trimeric autotransporter adhesins (TAA) (a) and CDS related to

868 LPS biosynthesis (b). Information of host of origin for each strain (Table 1) represented by the  
869 squares follow the indicated color legend shown in Fig. 2.

870

871 **Fig. 4.** Distribution of core, singleton and accessory genomes of the 94 genomes strains  
872 among Clusters of Orthologous Groups (COG) functional categories. [J] Translation,  
873 ribosomal structure and biogenesis; [M] Cell wall/membrane/envelope biogenesis; [E] Amino  
874 acid transport and metabolism; [H] Coenzyme transport and metabolism; [R] General function  
875 prediction only; [O] Posttranslational modification, protein turnover, chaperones; [C] Energy  
876 production and conversion; [L] Replication, recombination and repair; [P] Inorganic ion  
877 transport and metabolism; [G] Carbohydrate transport and metabolism; [T] Signal transduction  
878 mechanisms; [K] Transcription; [I] Lipid transport and metabolism; [F] Nucleotide transport and  
879 metabolism; [N] Cell Motility; [U] Intracellular trafficking, secretion, and vesicular transport; [V]  
880 Defense mechanisms; [D] Cell cycle control, cell division, chromosome partitioning; [W]  
881 Extracellular structures; [Q] Secondary metabolites biosynthesis, transport and catabolism; [X]  
882 Mobilome: prophages, transposons; [A] RNA processing and modification; [Z] Cytoskeleton;  
883 [Y] Nuclear structure; [B] Chromatin structure and dynamics; [S] Function unknown.

884

885 **Fig. 5** Percentage of mobile genetics elements distributed among the *X. fastidiosa* strains  
886 according to their genome assembly level: complete, scaffold and contig.

887

888 **Fig. 6** Sequence Similarity Network of the *X. fastidiosa* mobilome. Prophage, genomic islands,  
889 insertion sequences and plasmids as indicated by distinct colors. Nodes correspond to each  
890 of the distinct MGEs predicted in the 94 strains analyzed, the edges represent the similarity of  
891 nucleotide sequence with more than 75% of identity and 40% of the coverage, and  $evalue <$   
892  $1e-6$ .

893

894 **Fig. 7.** Circus plot showing the distribution of the different immunity systems in the genomes of  
895 *X. fastidiosa* strains.



**Table 1. Final curated collection of *Xylella fastidiosa* genome assemblies**

| Strain name    | Assembly accession | Genome assembly status | Plasmid number | Country of isolation | Host of origin                 | Sequence Type |
|----------------|--------------------|------------------------|----------------|----------------------|--------------------------------|---------------|
| 32             | GCA_000506405      | Contig                 | 0              | Brazil               | <i>Coffea sp</i>               | 16            |
| 3124           | GCA_001456195      | Complete               | 0              | Brazil               | <i>Coffea arabica</i>          | 16            |
| 11399          | GCA_001684415      | Contig                 | 2              | Brazil               | <i>Citrus sinensis</i>         | 11            |
| 6c             | GCA_000506905      | Contig                 | 1              | Brazil               | <i>Coffea sp</i>               | 14            |
| 9a5c           | GCA_000006725      | Complete               | 2              | Brazil               | <i>Citrus sinensis</i>         | 13            |
| AlmaEM3        | GCA_018069645      | Complete               | 0              | USA                  | <i>Vaccinium sp</i>            | 42            |
| Ann-1          | GCA_000698805      | Complete               | 1              | USA                  | <i>Nerium sp</i>               | 5             |
| ATCC-35871     | GCA_000428665      | Scaffold               | 0              | USA                  | <i>Prunus sp</i>               | 41            |
| ATCC-35879     | GCA_011801475      | Complete               | 1              | USA                  | <i>Vitis sp</i>                | 2             |
| B111           | GCA_013283685      | Scaffold               | 2              | Brazil               | <i>Citrus sinensis</i>         | 11            |
| Bakersfield-1  | GCA_009664125      | Complete               | 1              | USA                  | <i>Vitis vinifera</i>          | 1             |
| Bakersfield-11 | GCA_015476015      | Complete               | 1              | USA                  | <i>Vitis vinifera</i>          | 1             |
| Bakersfield-13 | GCA_015475995      | Complete               | 1              | USA                  | <i>Vitis vinifera</i>          | 1             |
| Bakersfield-14 | GCA_015475975      | Complete               | 1              | USA                  | <i>Vitis vinifera</i>          | 1             |
| Bakersfield-8  | GCA_015476035      | Complete               | 1              | USA                  | <i>Vitis vinifera</i>          | 1             |
| BB01           | GCA_001886315      | Scaffold               | 0              | USA                  | <i>Vaccinium corymbosum</i>    | 42            |
| BB08-1         | GCA_018069665      | Complete               | 0              | USA                  | <i>Vaccinium sp</i>            | 43            |
| CFBP7970       | GCA_004016315      | Contig                 | 1              | USA                  | <i>Vitis sp</i>                | 2             |
| CFBP8071       | GCA_004016295      | Contig                 | 1              | USA                  | <i>Prunus dulcis</i>           | 1             |
| CFBP8072       | GCA_001469345      | Scaffold               | 0              | Ecuador              | <i>Coffea arabica</i>          | 74            |
| CFBP8073       | GCA_001469395      | Scaffold               | 0              | Mexico               | <i>Coffea canephora</i>        | 75            |
| CFBP8078       | GCA_004016365      | Contig                 | 0              | USA                  | <i>Vinca sp</i>                | 51            |
| CFBP8082       | GCA_004016375      | Contig                 | 1              | USA                  | <i>Ambrosia artemisiifolia</i> | 2             |
| CFBP8351       | GCA_004016405      | Contig                 | 1              | USA                  | <i>Vitis vinifera</i>          | 1             |
| CFBP8356       | GCA_004016415      | Scaffold               | 0              | Costa-Rica           | <i>Coffea arabica</i>          | 76            |
| CFBP8416       | GCA_001971475      | Contig                 | 0              | France               | <i>Polygala myrtifolia</i>     | 7             |
| CFBP8417       | GCA_001971505      | Contig                 | 0              | France               | <i>Spartium junceum</i>        | 6             |
| CO33           | GCA_001417925      | Contig                 | 0              | Costa-Rica           | <i>Coffea sp</i>               | 72            |
| CoDiRO         | GCA_000811965      | Contig                 | 1              | Italy                | <i>Olea sp</i>                 | 53            |
| COF0324        | GCA_001549815      | Contig                 | 4              | Brazil               | <i>Coffea sp</i>               | 14            |
| COF0407        | GCA_001549825      | Contig                 | 4              | Costa-Rica           | <i>Coffea sp</i>               | 53            |
| CVC0251        | GCA_001549765      | Contig                 | 4              | Brazil               | <i>Citrus sinensis</i>         | 11            |
| CVC0256        | GCA_001549745      | Contig                 | 4              | Brazil               | <i>Citrus sinensis</i>         | 11            |
| De-Donno       | GCA_002117875      | Complete               | 1              | Italy                | <i>Olea europaea</i>           | 53            |
| Dixon          | GCA_000166835      | Scaffold               | 1              | USA                  | <i>Prunus sp</i>               | 6             |
| DSM-10026      | GCA_900129695      | Scaffold               | 0              | USA                  | <i>Vitis vinifera</i>          | 2             |
| EB92-1         | GCA_000219235      | Contig                 | 1              | USA                  | <i>Sambucus canadensis</i>     | 1             |
| ESVL           | GCA_004023385      | Contig                 | 2              | Spain                | <i>Prunus dulcis</i>           | 6             |
| Fb7            | GCA_001456335      | Complete               | 1              | Argentina            | <i>Citrus sp</i>               | 69            |
| Fillmore       | GCA_012974105      | Complete               | 0              | USA                  | <i>Olea europaea</i>           | 81            |
| GB514          | GCA_000148405      | Complete               | 1              | USA                  | <i>Vitis sp</i>                | 1             |
| Griffin-1      | GCA_000466025      | Contig                 | 0              | USA                  | <i>Quercus rubra</i>           | 7             |
| GV156          | GCA_009910885      | Contig                 | 0              | Taiwan               | <i>Vitis vinifera</i>          | 2             |
| GV230          | GCA_014249995      | Complete               | 0              | Taiwan               | <i>Vitis labrusca</i>          | 2             |
| Hib4           | GCA_001456315      | Complete               | 1              | Brazil               | <i>Hibiscus sp</i>             | 70            |
| IAS-AXF-235T10 | GCA_009669465      | Contig                 | 1              | Spain                | <i>Prunus dulcis</i>           | 6             |
| IVIA5235       | GCA_003515915      | Complete               | 1              | Spain                | <i>Prunus avium</i>            | 1             |
| IVIA5901       | GCA_004023395      | Complete               | 0              | Spain                | <i>Prunus dulcis</i>           | 6             |
| IVIA6586-2     | GCA_009669335      | Contig                 | 2              | Spain                | <i>Helicrysum italicum</i>     | 6             |
| IVIA6731       | GCA_009669375      | Contig                 | 2              | Spain                | <i>Helicrysum italicum</i>     | 6             |
| J1a12          | GCA_001456235      | Complete               | 2              | Brazil               | <i>Citrus sp</i>               | 11            |
| LM10           | GCA_012974145      | Complete               | 0              | USA                  | <i>Olea europaea</i>           | 7             |
| M12            | GCA_000019325      | Complete               | 0              | USA                  | <i>Prunus sp</i>               | 7             |
| M23            | GCA_000019765      | Complete               | 1              | USA                  | <i>Prunus sp</i>               | 1             |
| Ma151          | GCA_018449095      | Contig                 | 0              | Italy                | <i>Rhamnus alaternus</i>       | 87            |
| MUL0034        | GCA_000698825      | Complete               | 1              | USA                  | <i>Morus alba</i>              | 30            |
| Mul-MD         | GCA_000567985      | Contig                 | 0              | USA                  | <i>Morus alba</i>              | 29            |
| NOB1           | GCA_012952075      | Scaffold               | 0              | USA                  | <i>Vitis rotundifolia</i>      | 2             |
| OK3            | GCA_012952085      | Scaffold               | 0              | USA                  | <i>Vitis vinifera</i>          | 2             |
| OLS0478        | GCA_001549755      | Contig                 | 2              | Costa-Rica           | <i>Nerium sp</i>               | 53            |
| OLS0479        | GCA_001549735      | Contig                 | 4              | Costa-Rica           | <i>Nerium sp</i>               | 53            |
| PD7202         | GCA_006370235      | Contig                 | 0              | Netherlands          | <i>Plant tissue</i>            | undetermined  |
| PD7211         | GCA_006370175      | Contig                 | 0              | Netherlands          | <i>Plant tissue</i>            | 73            |
| Pr8x           | GCA_001456295      | Complete               | 1              | Brazil               | <i>Prunus sp</i>               | 14            |
| RAAR14-plum327 | GCA_009695495      | Contig                 | 0              | Brazil               | <i>Prunus domestica</i>        | 26            |
| RAAR6-Butte    | GCA_009695485      | Contig                 | 0              | USA                  | <i>Prunus dulcis</i>           | 7             |
| Red-Oak-2      | GCA_015475935      | Complete               | 0              | USA                  | <i>Quercus rubra</i>           | 7             |
| RH1            | GCA_012974125      | Complete               | 0              | USA                  | <i>Olea europaea</i>           | 7             |
| Riv5           | GCA_015475955      | Complete               | 1              | USA                  | <i>Prunus cerasifera</i>       | 34            |
| Salento-1      | GCA_002954185      | Complete               | 1              | Italy                | <i>Olea europaea</i>           | 53            |
| Salento-2      | GCA_002954205      | Complete               | 1              | Italy                | <i>Olea europaea</i>           | 53            |
| Stag-s-Leap    | GCA_001572105      | Contig                 | 1              | USA                  | <i>Vitis sp</i>                | 1             |
| sycamore-Sy-VA | GCA_000732705      | Contig                 | 0              | USA                  | <i>Platanus occidentalis</i>   | 8             |
| Temecula1      | GCA_000007245      | Complete               | 1              | USA                  | <i>Vitis sp</i>                | 1             |
| Temecula1Star  | GCA_006370185      | Contig                 | 0              | USA                  | <i>Vitis sp</i>                | 1             |
| TemeculaL      | GCA_006370155      | Scaffold               | 0              | USA                  | <i>Vitis sp</i>                | 1             |
| TOS14          | GCA_007713995      | Contig                 | 0              | Italy                | <i>Spartium junceum</i>        | 87            |
| TOS4           | GCA_007713905      | Contig                 | 0              | Italy                | <i>Prunus dulcis</i>           | 87            |
| TOS5           | GCA_007713945      | Contig                 | 0              | Italy                | <i>Polygala myrtifolia</i>     | 87            |
| TPD3           | GCA_007845655      | Contig                 | 0              | Taiwan               | <i>Vitis vinifera</i>          | 2             |
| TPD4           | GCA_007845705      | Contig                 | 0              | Taiwan               | <i>Vitis vinifera</i>          | 2             |
| U24D           | GCA_001456275      | Complete               | 1              | Brazil               | <i>Citrus sinensis</i>         | 13            |
| VB11           | GCA_012952095      | Scaffold               | 1              | USA                  | <i>Vitis vinifera</i>          | 2             |
| WM1-1          | GCA_006370215      | Contig                 | 0              | USA                  | <i>Vitis sp</i>                | 2             |
| XF3348         | GCA_009669515      | Contig                 | 1              | Spain                | <i>Prunus dulcis</i>           | 81            |
| XRB            | GCA_013283695      | Scaffold               | 2              | Brazil               | <i>Citrus sp</i>               | 11            |
| XYL1732        | GCA_003973705      | Contig                 | 0              | Spain                | <i>Vitis sp</i>                | 1             |
| XYL1752        | GCA_009669505      | Contig                 | 1              | Spain                | <i>Prunus dulcis</i>           | 81            |
| XYL1968-18     | GCA_014856935      | Contig                 | 0              | Spain                | <i>Olea europaea</i>           | 81            |
| XYL1981        | GCA_009669455      | Contig                 | 0              | Spain                | <i>Ficus carica</i>            | 81            |
| XYL2055        | GCA_003973695      | Contig                 | 0              | Spain                | <i>Vitis sp</i>                | 1             |
| XYL2107-18     | GCA_014856795      | Scaffold               | 0              | Spain                | <i>Prunus dulcis</i>           | 1             |
| XYL2153-18     | GCA_014856785      | Scaffold               | 0              | Spain                | <i>Vitis vinifera</i>          | 1             |

bioRxiv preprint doi: <https://doi.org/10.1101/2021.10.17.464729>; this version posted October 17, 2021. The copyright holder for this preprint (which was not certified by peer review) is the author/funder, who has granted bioRxiv a license to display the preprint in perpetuity. It is made available under aCC-BY 4.0 International license.

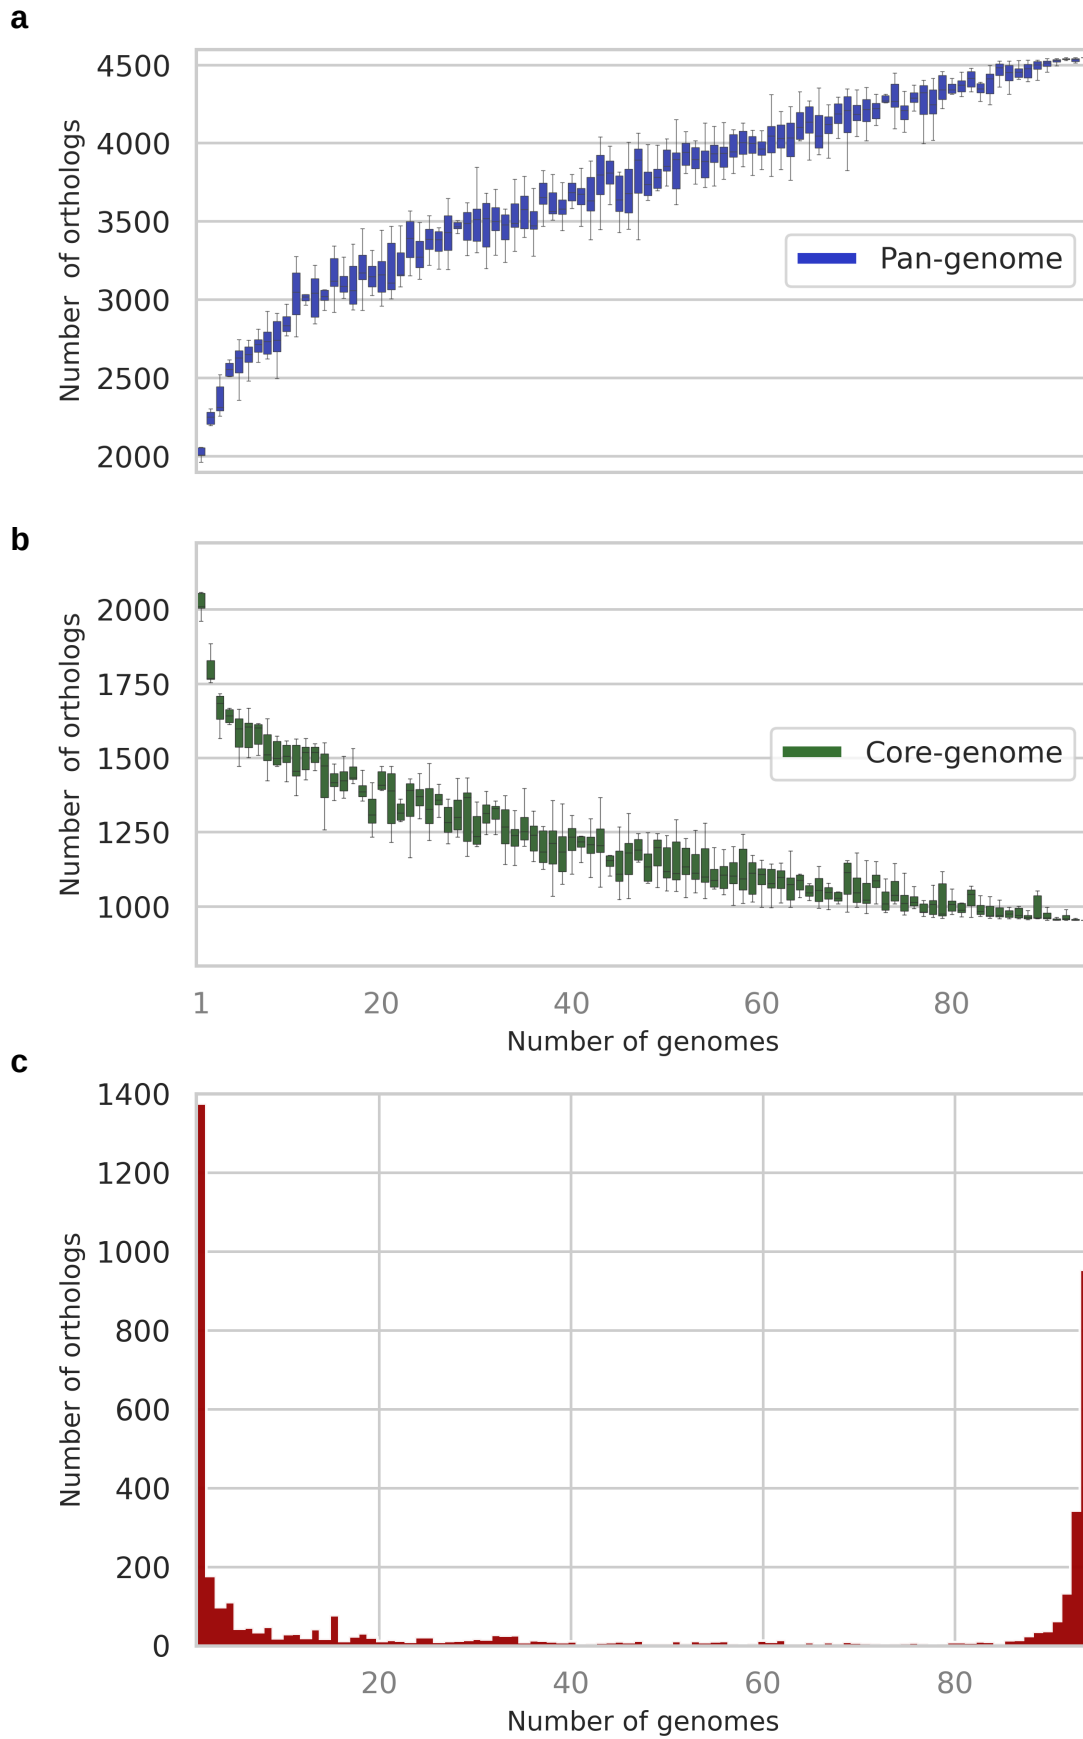

Fig. 1

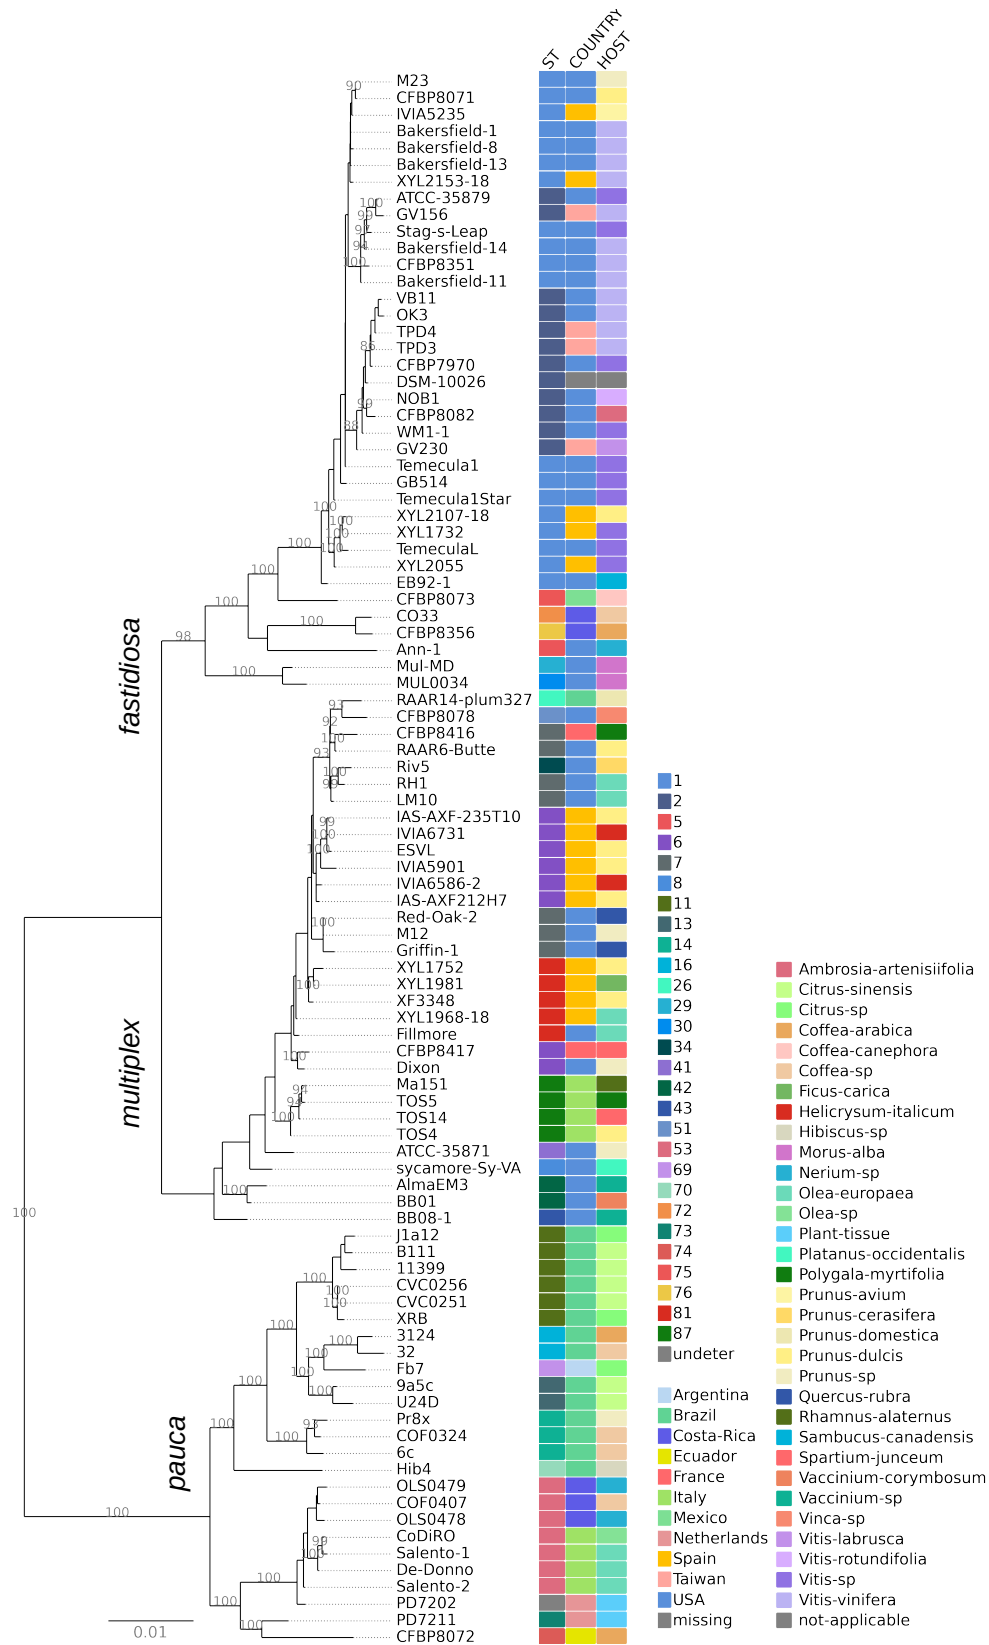

Fig. 2

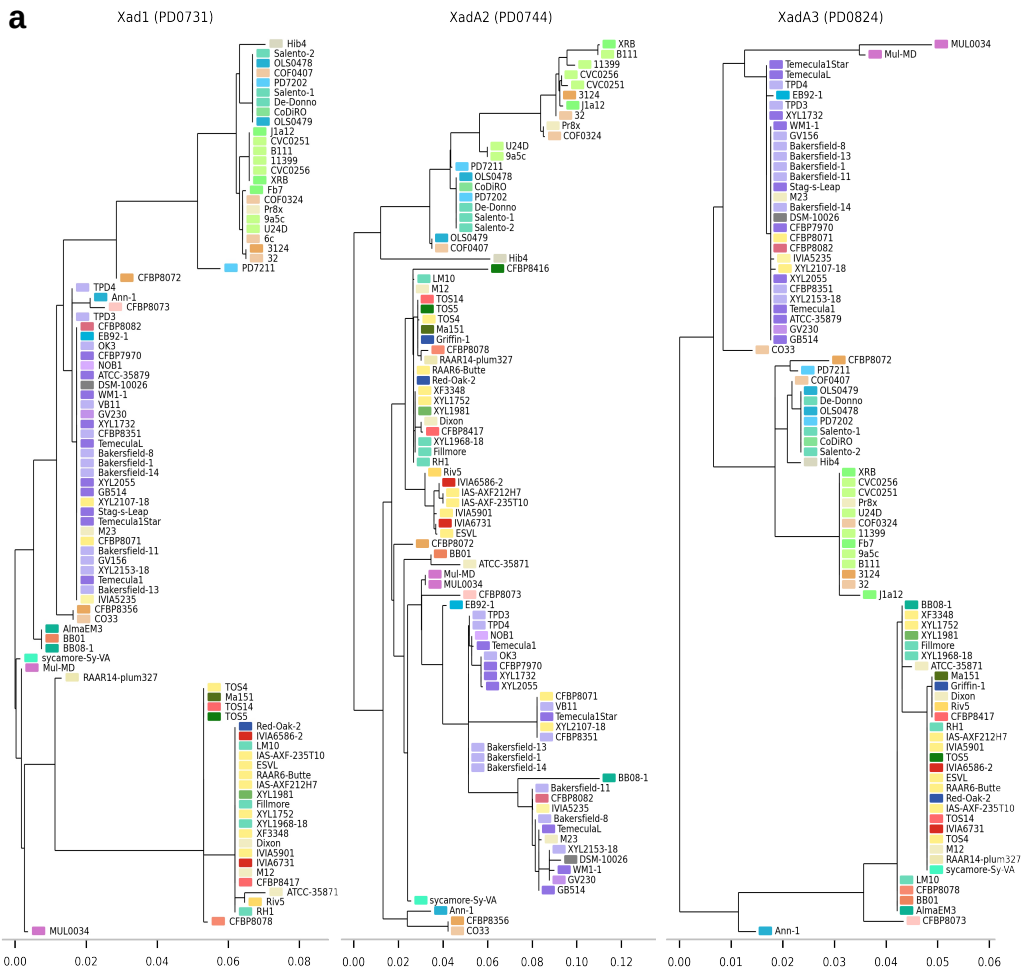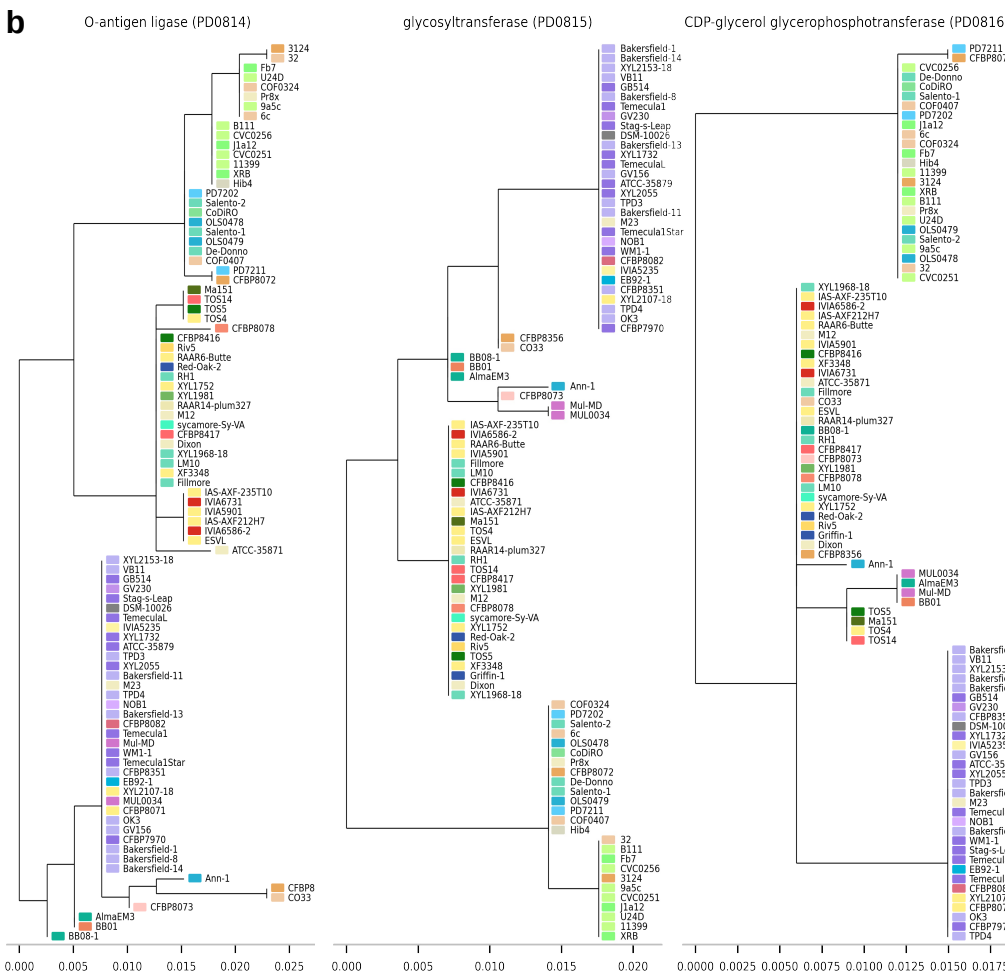

Fig. 3

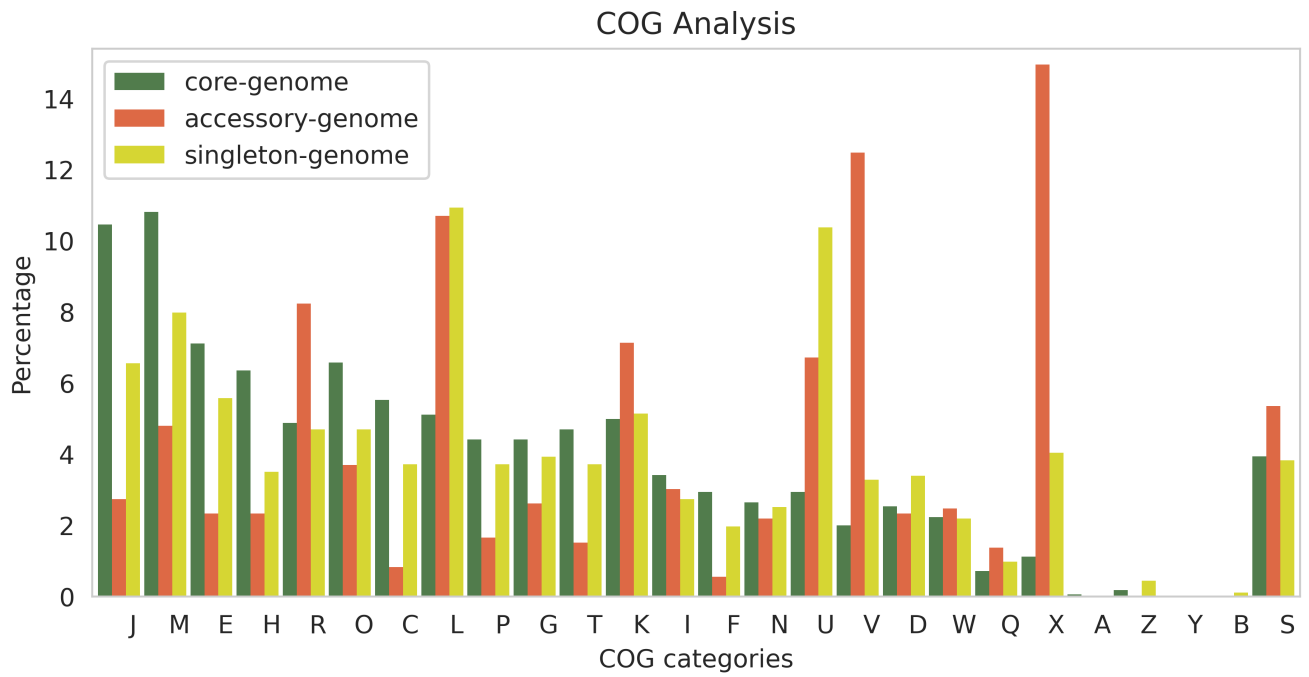

Fig. 4

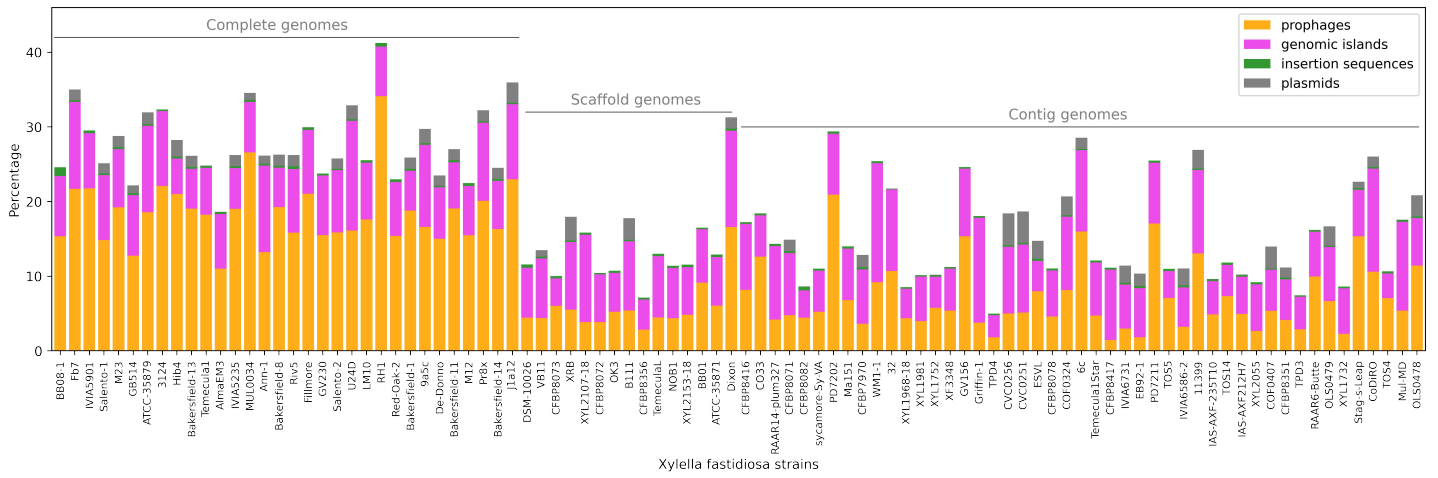

Fig. 5

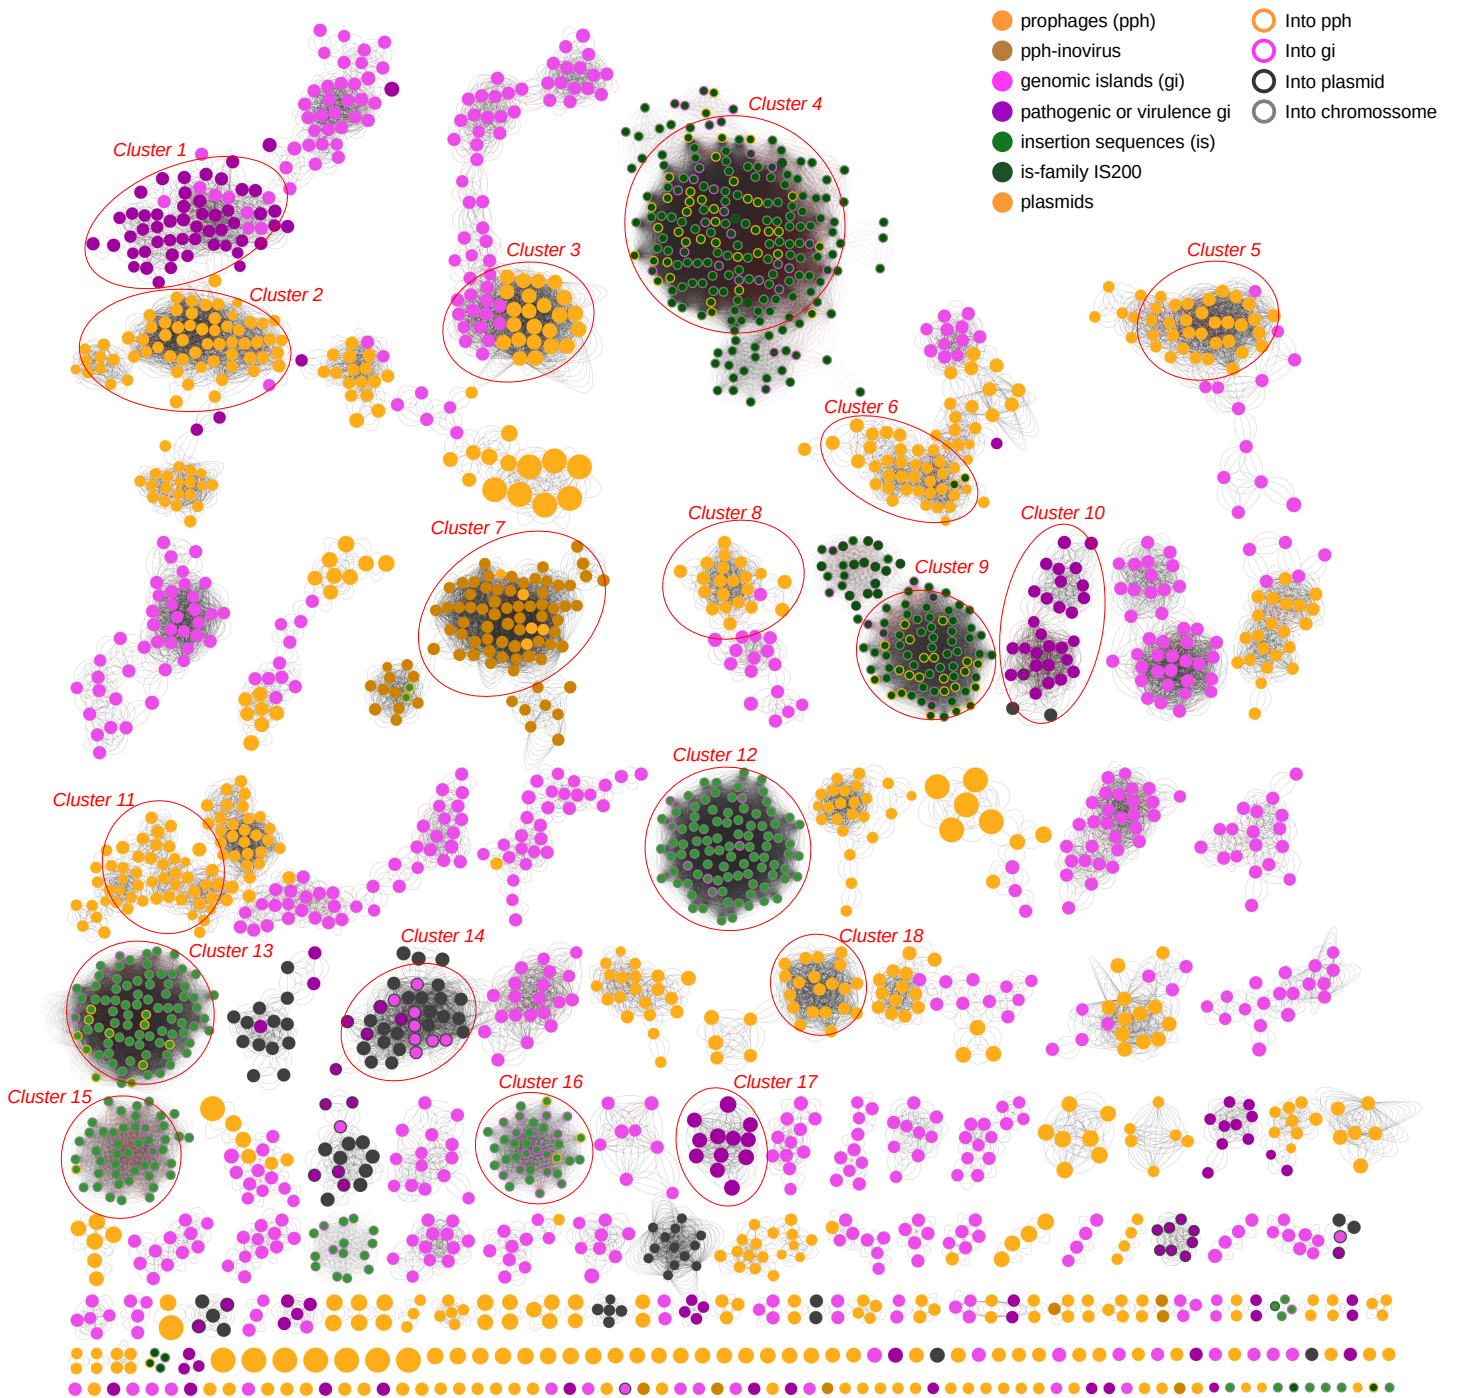

Fig. 6

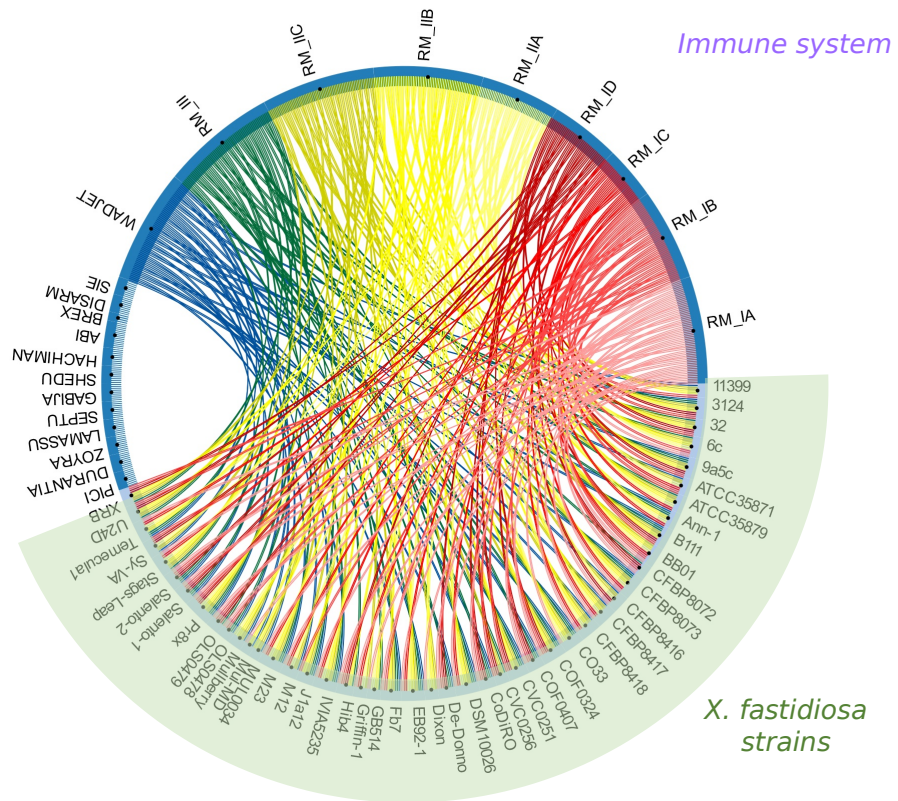

Fig. 7
